# Supplementary material for: A facile copper(i)-catalyzed homo-coupling of indanone derivatives using diaziridinone under mild conditions
Source: Royal Society of Chemistry journal article supplement (doi:10.1039/c9ob00901a), 2019-01-01
Supplement: c9ob00901a1.pdf [file c9ob00901a1.pdf]

**A facile copper(I)-catalyzed homo-coupling of indanone derivatives  
using diaziridinone under mild conditions**

**Wenyong Han, Yihui Yang, Yingguang Zhu, and Yian Shi\***

*Department of Chemistry  
Colorado State University  
Fort Collins, CO 80523*

E-mail: Yian.Shi@colostate.edu

**Supporting Information**

**Table of Contents**

|                                                                        |      |
|------------------------------------------------------------------------|------|
| General methods                                                        | S-2  |
| Representative procedure for homo-coupling of 1,3-dicarbonyl compounds | S-2  |
| Procedure for Scheme 3                                                 | S-2  |
| Procedure for Scheme 4                                                 | S-3  |
| Procedure for Scheme 5                                                 | S-3  |
| Characterization data                                                  | S-4  |
| X-ray structures of compounds <b>3a</b> and <b>3b</b>                  | S-10 |
| NMR spectra                                                            | S-31 |

**General methods.** All commercially available reagents were used without further purification. Column chromatography was performed on silica gel (200-400 mesh). <sup>1</sup>H NMR spectra were recorded on a 300 or 400 MHz NMR spectrometer and <sup>13</sup>C NMR spectra were recorded on a 75 or 100 MHz NMR spectrometer. IR spectra were recorded on a FT-IR spectrometer. Melting points were uncorrected.

Di-*t*-butyldiaziridinone (**1**) was prepared according to the reported procedures.<sup>1</sup> Methyl 1-oxo-2-indane-carboxylates **2a-2i** were prepared from corresponding 1-indanones and dimethyl carbonate based on the reported procedures.<sup>2</sup> 2-Phenyl-1*H*-indene-1,3(2*H*)-dione (**2k**) and ethyl 3-oxo-3-phenylpropanoate (**5**) were purchased from commercial suppliers. Diethyl 2,3-dibenzoylsuccinate (**7**) was prepared according to the reported procedures.<sup>3</sup>

- (1) H. Du, B. Zhao and Y. Shi, *Org. Synth.*, 2009, **86**, 315.
- (2) K. Van Emelen, T. De Wit, G. J. Hoornaert and F. Compennolle, *Org. Lett.*, 2000, **2**, 3083.
- (3) A. Wu, Y. Zhao, N. Chen and X. Pan, *Synth. Commun.*, 1997, **27**, 331.

**Representative procedure for the homo-coupling of 1,3-dicarbonyl compounds (Table 2, entry 1).** To a 1.5 mL vial equipped with a stir bar were successively added methyl 1-oxo-2-indane-carboxylate (**2a**) (0.0951 g, 0.50 mmol), CuCl (0.0025 g, 0.025 mmol), P(*n*-Bu)<sub>3</sub> (0.0051 g, 0.025 mmol), and toluene (0.8 mL). The mixture was stirred at room temperature for 10 minutes, followed by the addition of di-*t*-butyldiaziridinone (**1**) (0.1022 g, 0.60 mmol). The reaction mixture was vigorously stirred at room temperature for 24 h, concentrated, and purified by flash chromatography (silica gel, CH<sub>2</sub>Cl<sub>2</sub>:MeOH = 400:1) to give coupling products **3a** as white solid (major, 0.0851 g, 90%) and **3a'** as colorless oil (minor, 0.0038 g, 4%).

**Procedure for Scheme 3.** To a 4 mL vial equipped with a stir bar were successively added methyl 1-oxo-2-indane-carboxylate (**2a**) (0.0951 g, 0.50 mmol), CuCl (0.0025 g, 0.025 mmol), P(*n*-Bu)<sub>3</sub> (0.0051 g, 0.025 mmol), and toluene (0.8 mL). After the mixture was stirred at room temperature for 10 minutes, di-*t*-butyldiaziridinone (**1**) (0.1022 g, 0.60 mmol) was added, immediately followed by the addition of TEMPO

(0.1563 g, 1.0 mmol). The reaction mixture was vigorously stirred at room temperature for 24 h, concentrated, and purified by flash chromatography (silica gel, hexane:EtOAc = 25:1) to give compound **4** as a light yellow oil (0.1283 g, 74%).

**Procedure for Scheme 4.** To a 4 mL vial equipped with a stir bar were successively added ethyl 3-oxo-3-phenylpropanoate (**5**) (0.0961 g, 0.50 mmol), CuCl (0.0050 g, 0.050 mmol), P(*n*-Bu)<sub>3</sub> (0.0202 g, 0.10 mmol), and CDCl<sub>3</sub> (1.0 mL). The mixture was stirred at room temperature for 10 minutes, followed by the addition of di-*t*-butyl-diaziridinone (**1**) (0.3405 g, 2.0 mmol). The reaction mixture was vigorously stirred at 65 °C for 24 h, concentrated, and purified by flash chromatography (silica gel, hexane:CH<sub>2</sub>Cl<sub>2</sub>:EtOAc = 10:2:1) to give tetrasubstituted olefins **6** as a light yellow solid (mixture of *E*-**6** and *Z*-**6**, 0.070 g, 74%).

**Procedure for Scheme 5.** To a 4 mL vial equipped with a stir bar were successively added diethyl 2,3-dibenzoylsuccinate (**7**) (0.0956 g, 0.25 mmol), CuCl (0.0050 g, 0.050 mmol), P(*n*-Bu)<sub>3</sub> (0.0202 g, 0.10 mmol), and CDCl<sub>3</sub> (1.0 mL). The mixture was stirred at room temperature for 10 minutes, followed by the addition of di-*t*-butyl-diaziridinone (**1**) (0.3405 g, 2.0 mmol). The reaction mixture was vigorously stirred at 65 °C for 24 h, concentrated, and purified by flash chromatography (silica gel, hexanes:CH<sub>2</sub>Cl<sub>2</sub>:EtOAc = 10:2:1) to give tetrasubstituted olefins **6** as a light yellow solid (mixture of *E*-**6** and *Z*-**6**, 0.087 g, 91%).

## Characterization data

**Table 2, entry 1**

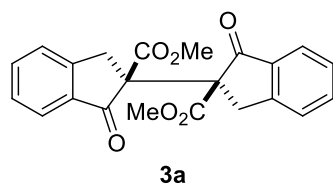

**3a** (major): white solid; mp 146-147 °C; IR (neat) 1730, 1703, 1172  $\text{cm}^{-1}$ ;  $^1\text{H}$  NMR (300 MHz,  $\text{CDCl}_3$ )  $\delta$  7.65-7.56 (m, 2H), 7.51 (d,  $J = 7.8$  Hz, 2H), 7.43 (d,  $J = 7.8$  Hz, 2H), 7.26 (dd,  $J = 7.8$  Hz, 6.9 Hz, 2H), 4.53 (d,  $J = 18.3$  Hz, 2H), 3.92 (d,  $J = 18.3$  Hz, 2H), 3.68 (s, 6H);  $^{13}\text{C}$  NMR (75 MHz,  $\text{CDCl}_3$ )  $\delta$  200.2, 171.0, 154.9, 136.1, 135.3, 127.6, 126.4, 124.6, 62.9, 53.2, 37.6; HRMS calcd for  $\text{C}_{22}\text{H}_{19}\text{O}_6$  ( $\text{M}+\text{H}$ ) $^+$ : 379.1176; found: 379.1186.

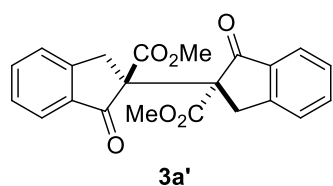

**3a'** (minor): colorless oil; IR (neat) 1760, 1723, 1249  $\text{cm}^{-1}$ ;  $^1\text{H}$  NMR (300 MHz,  $\text{CDCl}_3$ )  $\delta$  7.90-7.83 (m, 2H), 7.75-7.66 (m, 2H), 7.52-7.44 (m, 4H), 4.11 (d,  $J = 17.7$  Hz, 2H), 3.82 (s, 6H), 3.57 (d,  $J = 17.7$  Hz, 2H);  $^{13}\text{C}$  NMR (100 MHz,  $\text{CDCl}_3$ )  $\delta$  195.2, 167.9, 150.7, 136.7, 132.7, 128.8, 126.5, 126.2, 68.1, 54.3, 43.6; HRMS calcd for  $\text{C}_{22}\text{H}_{19}\text{O}_6$  ( $\text{M}+\text{H}$ ) $^+$ : 379.1176; found: 379.1180.

**Table 2, entry 2**

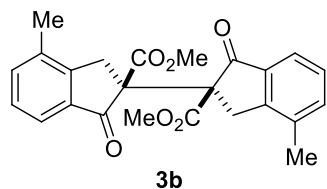

White solid; mp 165-166 °C; IR (neat) 1735, 1703, 1265, 1213  $\text{cm}^{-1}$ ;  $^1\text{H}$  NMR (300 MHz,  $\text{CDCl}_3$ )  $\delta$  7.39 (d,  $J = 6.9$  Hz, 2H), 7.22 (d,  $J = 7.5$  Hz, 2H), 7.15 (dd,  $J = 7.5, 6.9$  Hz, 2H), 4.40 (d,  $J = 18.3$  Hz, 2H), 3.79 (d,  $J = 18.3$  Hz, 2H), 3.70 (s, 6H),

2.42 (s, 6H);  $^{13}\text{C}$  NMR (75 MHz,  $\text{CDCl}_3$ )  $\delta$  200.4, 171.2, 153.9, 136.5, 135.8, 135.0, 127.8, 121.9, 63.1, 53.1, 36.4, 18.0; HRMS calcd for  $\text{C}_{24}\text{H}_{23}\text{O}_6$  ( $\text{M}+\text{H}$ ) $^+$ : 407.1489; found: 407.1491.

**Table 2, entry 3**

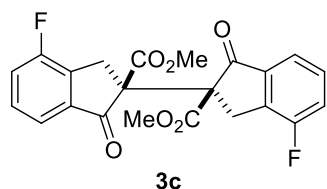

White solid; mp 151-152 °C; IR (neat) 1735, 1722, 1481, 1263, 1243  $\text{cm}^{-1}$ ;  $^1\text{H}$  NMR (300 MHz,  $\text{CDCl}_3$ )  $\delta$  7.32-7.25 (m, 6H), 4.48 (d,  $J = 18.3$  Hz, 2H), 3.93 (d,  $J = 18.3$  Hz, 2H), 3.69 (s, 6H);  $^{13}\text{C}$  NMR (75 MHz,  $\text{CDCl}_3$ )  $\delta$  199.1, 170.2, 159.7 (d,  $J = 250.7$  Hz), 140.7 (d,  $J = 20.6$  Hz), 138.1 (d,  $J = 4.6$  Hz), 129.6 (d,  $J = 5.7$  Hz), 122.1 (d,  $J = 20.6$  Hz), 120.4 (d,  $J = 3.5$  Hz), 62.7, 53.4, 33.6; HRMS calcd for  $\text{C}_{22}\text{H}_{17}\text{F}_2\text{O}_6$  ( $\text{M}+\text{H}$ ) $^+$ : 415.0988; found: 415.0990.

**Table 2, entry 4**

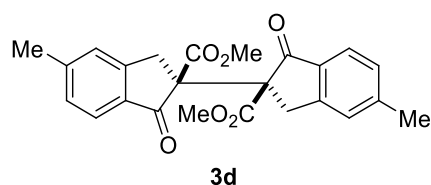

White solid; mp 218-219 °C; IR (neat) 1735, 1702, 1606, 1193, 1175  $\text{cm}^{-1}$ ;  $^1\text{H}$  NMR (300 MHz,  $\text{CDCl}_3$ )  $\delta$  7.33 (d,  $J = 7.8$  Hz, 2H), 7.30 (s, 2H), 7.06 (d,  $J = 7.8$  Hz, 2H), 4.50 (d,  $J = 18.3$  Hz, 2H), 3.85 (d,  $J = 18.3$  Hz, 2H), 3.67 (s, 6H), 2.43 (s, 6H);  $^{13}\text{C}$  NMR (75 MHz,  $\text{CDCl}_3$ )  $\delta$  199.6, 171.3, 155.6, 147.5, 133.1, 129.0, 126.7, 124.5, 63.0, 53.1, 37.4, 22.5; HRMS calcd for  $\text{C}_{24}\text{H}_{23}\text{O}_6$  ( $\text{M}+\text{H}$ ) $^+$ : 407.1489; found: 407.1498.

**Table 2, entry 5**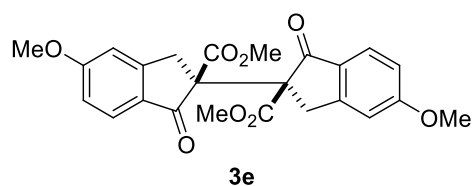

White solid; mp 189-190 °C; IR (neat) 1725, 1695, 1595, 1260  $\text{cm}^{-1}$ ;  $^1\text{H}$  NMR (300 MHz,  $\text{CDCl}_3$ )  $\delta$  7.37 (d,  $J = 8.7$  Hz, 2H), 6.91 (d,  $J = 2.1$  Hz, 2H), 6.78 (dd,  $J = 8.7, 2.1$  Hz, 2H), 4.52 (d,  $J = 18.6$  Hz, 2H), 3.88 (s, 6H), 3.84 (d,  $J = 18.6$  Hz, 2H), 3.68 (s, 6H);  $^{13}\text{C}$  NMR (75 MHz,  $\text{CDCl}_3$ )  $\delta$  198.1, 171.4, 166.4, 158.4, 128.5, 126.4, 116.4, 108.8, 63.1, 55.9, 53.0, 37.5; HRMS calcd for  $\text{C}_{24}\text{H}_{23}\text{O}_8$  ( $\text{M}+\text{H}$ ) $^+$ : 439.1387; found: 439.1390.

**Table 2, entry 6**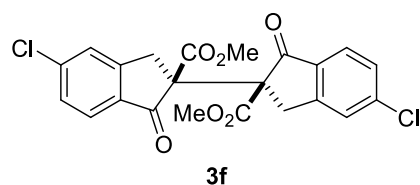

Yellow solid; mp 175-176 °C; IR (neat) 1736, 1698, 1598, 1259  $\text{cm}^{-1}$ ;  $^1\text{H}$  NMR (300 MHz,  $\text{CDCl}_3$ )  $\delta$  7.51 (s, 2H), 7.41 (d,  $J = 8.1$  Hz, 2H), 7.26 (d,  $J = 8.1$  Hz, 2H), 4.49 (d,  $J = 18.3$  Hz, 2H), 3.89 (d,  $J = 18.3$  Hz, 2H), 3.68 (s, 6H);  $^{13}\text{C}$  NMR (75 MHz,  $\text{CDCl}_3$ )  $\delta$  198.9, 170.4, 156.4, 142.9, 133.7, 128.6, 126.6, 125.8, 62.9, 53.3, 37.4; HRMS calcd for  $\text{C}_{22}\text{H}_{16}\text{Cl}_2\text{NaO}_6$  ( $\text{M}+\text{Na}$ ) $^+$ : 469.0216; found: 469.0223.

**Table 2, entry 7**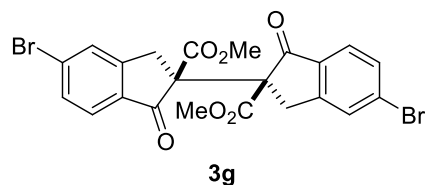

White solid; mp 175-176 °C; IR (neat) 1731, 1698, 1596, 1169  $\text{cm}^{-1}$ ;  $^1\text{H}$  NMR (300 MHz,  $\text{CDCl}_3$ )  $\delta$  7.69 (s, 2H), 7.43 (d,  $J = 8.1$  Hz, 2H), 7.33 (d,  $J = 8.1$  Hz, 2H), 4.49 (d,  $J = 18.3$  Hz, 2H), 3.89 (d,  $J = 18.3$  Hz, 2H), 3.68 (s, 6H);  $^{13}\text{C}$  NMR (75

MHz, CDCl<sub>3</sub>)  $\delta$  199.1, 170.4, 156.5, 134.1, 131.9, 131.4, 129.7, 125.9, 62.8, 53.4, 37.3; HRMS calcd for C<sub>22</sub>H<sub>16</sub>Br<sub>2</sub>NaO<sub>6</sub> (M+Na)<sup>+</sup>: 556.9206; found: 556.9213.

**Table 2, entry 8**

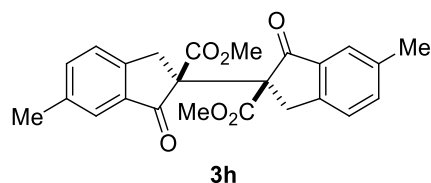

White solid; mp 184-185 °C; IR (neat) 1738, 1703, 1168, 1156, 1031 cm<sup>-1</sup>; <sup>1</sup>H NMR (300 MHz, CDCl<sub>3</sub>)  $\delta$  7.46-7.34 (m, 4H), 7.25 (s, 2H), 4.47 (d, *J* = 18.3 Hz, 2H), 3.85 (d, *J* = 18.3 Hz, 2H), 3.66 (s, 6H), 2.31 (s, 6H); <sup>13</sup>C NMR (75 MHz, CDCl<sub>3</sub>)  $\delta$  200.3, 171.1, 152.5, 137.42, 137.39, 135.5, 126.0, 124.5, 63.1, 53.0, 37.3, 21.1; HRMS calcd for C<sub>24</sub>H<sub>23</sub>O<sub>6</sub> (M+H)<sup>+</sup>: 407.1489; found: 407.1498.

**Table 2, entry 9**

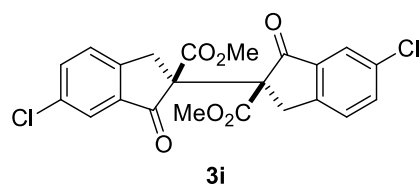

Light yellow solid; mp 209-210 °C; IR (neat) 1736, 1702, 1171, 1031 cm<sup>-1</sup>; <sup>1</sup>H NMR (300 MHz, CDCl<sub>3</sub>)  $\delta$  7.58 (dd, *J* = 8.1, 2.1 Hz, 2H), 7.50-7.41 (m, 4H), 4.45 (d, *J* = 18.3 Hz, 2H), 3.87 (d, *J* = 18.3 Hz, 2H), 3.67 (s, 6H); <sup>13</sup>C NMR (75 MHz, CDCl<sub>3</sub>)  $\delta$  199.1, 170.3, 153.1, 136.7, 136.2, 134.1, 127.6, 124.4, 63.3, 53.4, 37.4; HRMS calcd for C<sub>22</sub>H<sub>16</sub>Cl<sub>2</sub>NaO<sub>6</sub> (M+Na)<sup>+</sup>: 469.0216; found: 469.0214.

**Table 2, entry 10**

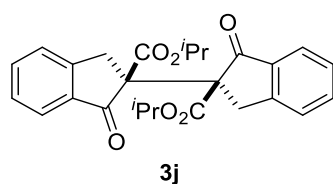

Colorless oil; IR (neat) 1734, 1709, 1607, 1278, 1104 cm<sup>-1</sup>; <sup>1</sup>H NMR (400 MHz,

CDCl<sub>3</sub>)  $\delta$  7.65-7.55 (m, 2H), 7.50 (d,  $J = 7.7$  Hz, 2H), 7.37 (d,  $J = 7.7$  Hz, 2H), 7.23 (t,  $J = 7.4$  Hz, 2H), 5.04 (septet,  $J = 6.3$  Hz, 2H), 4.51 (d,  $J = 18.0$  Hz, 2H), 3.89 (d,  $J = 18.0$  Hz, 2H), 1.21 (d,  $J = 6.3$  Hz, 6H), 1.13 (d,  $J = 6.3$  Hz, 6H); <sup>13</sup>C NMR (100 MHz, CDCl<sub>3</sub>)  $\delta$  200.5, 169.9, 154.8, 135.7, 135.3, 127.3, 126.2, 124.3, 69.8, 63.4, 37.5, 21.7, 21.4.

**Table 2, entry 11**

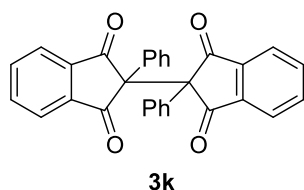

White solid; mp 211-212 °C; IR (neat) 1698, 1252 cm<sup>-1</sup>; <sup>1</sup>H NMR (300 MHz, CDCl<sub>3</sub>)  $\delta$  7.92-7.85 (m, 4H), 7.78-7.71 (m, 4H), 7.38-7.30 (m, 2H), 7.29-7.22 (m, 4H), 7.22-7.14 (m, 4H); <sup>13</sup>C NMR (75 MHz, CDCl<sub>3</sub>)  $\delta$  197.6, 141.1, 135.8, 130.6, 130.1, 128.9, 127.7, 124.0, 64.6; HRMS calcd for C<sub>30</sub>H<sub>19</sub>O<sub>4</sub> (M+H)<sup>+</sup>: 443.1278; found: 443.1283.

**Scheme 3**

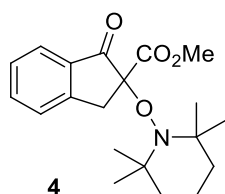

Light yellow oil; IR (neat) 1759, 1717, 1166 cm<sup>-1</sup>; <sup>1</sup>H NMR (300 MHz, CDCl<sub>3</sub>)  $\delta$  7.73 (d,  $J = 7.5$  Hz, 1H), 7.61 (t,  $J = 7.5$  Hz, 1H), 7.48 (d,  $J = 7.5$  Hz, 1H), 7.35 (t,  $J = 7.5$  Hz, 1H), 4.59 (d,  $J = 17.7$  Hz, 1H), 3.73 (s, 3H), 3.45 (d,  $J = 17.7$  Hz, 1H), 1.63-1.24 (m, 6H), 1.32 (s, 3H), 1.18 (s, 3H), 1.04 (s, 3H), 0.56 (s, 3H); <sup>13</sup>C NMR (75 MHz, CDCl<sub>3</sub>)  $\delta$  200.7, 170.3, 153.0, 135.6, 133.7, 127.4, 126.0, 124.6, 89.9, 60.2, 59.2, 52.7, 40.2, 40.0, 33.4, 32.1, 31.9, 20.7, 20.3, 16.8; HRMS calcd for C<sub>20</sub>H<sub>28</sub>NO<sub>4</sub> (M+H)<sup>+</sup>: 346.2013; found: 346.2015.



#### Scheme 4

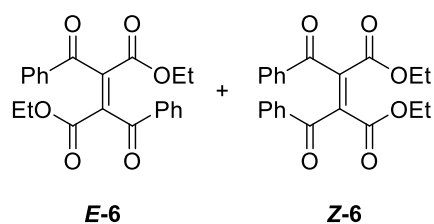

Light yellow solid; IR (neat) 1722, 1680, 1236  $\text{cm}^{-1}$ ;  $^1\text{H}$  NMR (300 MHz,  $\text{CDCl}_3$ ) **Major isomer:**  $\delta$  8.04-7.94 (m, 4H), 7.66-7.56 (m, 2H), 7.56-7.46 (m, 4H), 4.02 (q,  $J = 7.2$  Hz, 4H), 0.93 (t,  $J = 7.2$  Hz, 6H); **Minor isomer:** 7.85-7.78 (m, 4H), 7.66-7.56 (m, 2H), 7.44-7.36 (m, 4H), 4.26 (q,  $J = 7.2$  Hz, 4H), 1.20 (t,  $J = 7.2$  Hz, 6H);  $^{13}\text{C}$  NMR (75 MHz,  $\text{CDCl}_3$ ) **Major and Minor isomers:**  $\delta$  191.2, 190.7, 163.5, 162.7, 142.3, 142.2, 135.8, 135.6, 134.4, 134.1, 129.5, 129.1, 129.0, 128.8, 62.9, 62.8, 13.9, 13.5; HRMS calcd for  $\text{C}_{22}\text{H}_{21}\text{O}_6$  ( $\text{M}+\text{H}$ ) $^+$ : 381.1333; found: 381.1336.

### X-ray structure of 3a

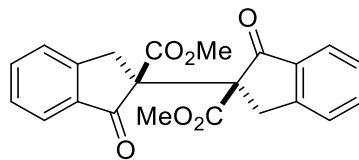

**3a**

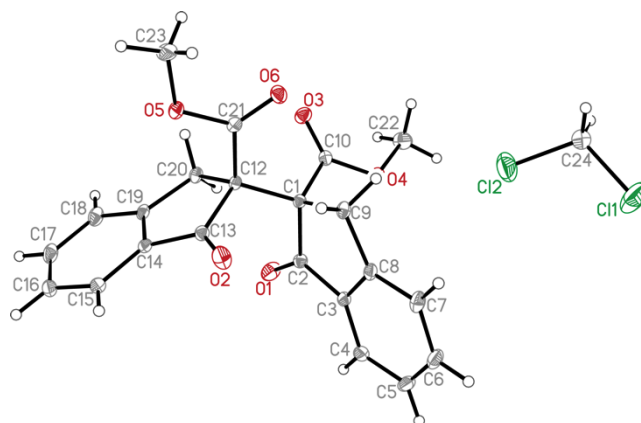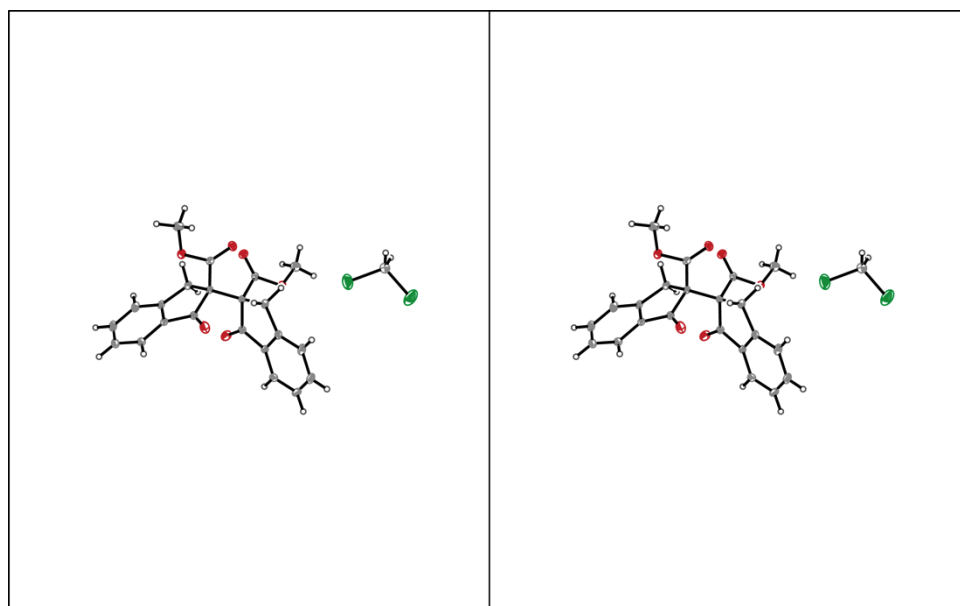

Table 1. Crystal data and structure refinement for **3a**.

|                                   |                                                                |                  |
|-----------------------------------|----------------------------------------------------------------|------------------|
| Identification code               | shi06_new                                                      |                  |
| Empirical formula                 | C <sub>23</sub> H <sub>20</sub> Cl <sub>2</sub> O <sub>6</sub> |                  |
| Formula weight                    | 463.29                                                         |                  |
| Temperature                       | 120(2) K                                                       |                  |
| Wavelength                        | 0.71073 Å                                                      |                  |
| Crystal system                    | Monoclinic                                                     |                  |
| Space group                       | C 2/c                                                          |                  |
| Unit cell dimensions              | a = 12.9425(9) Å                                               | α = 90°.         |
|                                   | b = 15.6165(11) Å                                              | β = 101.551(3)°. |
|                                   | c = 10.6618(7) Å                                               | γ = 90°.         |
| Volume                            | 2111.3(3) Å <sup>3</sup>                                       |                  |
| Z                                 | 4                                                              |                  |
| Density (calculated)              | 1.458 Mg/m <sup>3</sup>                                        |                  |
| Absorption coefficient            | 0.346 mm <sup>-1</sup>                                         |                  |
| F(000)                            | 960                                                            |                  |
| Crystal size                      | 0.187 x 0.123 x 0.087 mm <sup>3</sup>                          |                  |
| Theta range for data collection   | 2.069 to 27.951°.                                              |                  |
| Index ranges                      | -17 ≤ h ≤ 17, -20 ≤ k ≤ 20, -14 ≤ l ≤ 14                       |                  |
| Reflections collected             | 18659                                                          |                  |
| Independent reflections           | 2541 [R(int) = 0.0368]                                         |                  |
| Completeness to theta = 25.242°   | 100.0 %                                                        |                  |
| Absorption correction             | Semi-empirical from equivalents                                |                  |
| Refinement method                 | Full-matrix least-squares on F <sup>2</sup>                    |                  |
| Data / restraints / parameters    | 2541 / 0 / 142                                                 |                  |
| Goodness-of-fit on F <sup>2</sup> | 1.042                                                          |                  |
| Final R indices [I > 2σ(I)]       | R1 = 0.0387, wR2 = 0.0956                                      |                  |
| R indices (all data)              | R1 = 0.0493, wR2 = 0.1028                                      |                  |
| Extinction coefficient            | n/a                                                            |                  |
| Largest diff. peak and hole       | 0.423 and -0.525 e.Å <sup>-3</sup>                             |                  |

Table 2. Atomic coordinates ( $\times 10^4$ ) and equivalent isotropic displacement parameters ( $\text{\AA}^2 \times 10^3$ ) for **3a**.  $U(\text{eq})$  is defined as one third of the trace of the orthogonalized  $U^{ij}$  tensor.

|       | x        | y       | z       | U(eq) |
|-------|----------|---------|---------|-------|
| C(1)  | 9480(1)  | 2202(1) | 3669(1) | 13(1) |
| C(2)  | 9486(1)  | 2957(1) | 2764(1) | 12(1) |
| C(3)  | 9402(1)  | 3788(1) | 3557(1) | 14(1) |
| C(4)  | 8358(1)  | 4166(1) | 3098(1) | 14(1) |
| C(5)  | 7920(1)  | 4879(1) | 3587(1) | 19(1) |
| C(6)  | 6901(1)  | 5112(1) | 3013(2) | 24(1) |
| C(7)  | 6349(1)  | 4644(1) | 1976(2) | 24(1) |
| C(8)  | 6790(1)  | 3936(1) | 1494(1) | 21(1) |
| C(9)  | 7811(1)  | 3696(1) | 2072(1) | 15(1) |
| C(10) | 8444(1)  | 2958(1) | 1726(1) | 15(1) |
| C(11) | 8533(1)  | 1565(1) | 5094(2) | 28(1) |
| O(1)  | 10140(1) | 1652(1) | 3901(1) | 20(1) |
| O(2)  | 8627(1)  | 2241(1) | 4194(1) | 22(1) |
| O(3)  | 10093(1) | 4050(1) | 4403(1) | 26(1) |
| C(12) | 5000     | 1100(2) | 2500    | 28(1) |
| Cl(1) | 6135(1)  | 1732(1) | 2697(1) | 70(1) |

Table 3. Bond lengths [ $\text{\AA}$ ] and angles [ $^\circ$ ] for **3a**.

---

|                   |            |
|-------------------|------------|
| C(1)-O(1)         | 1.2010(17) |
| C(1)-O(2)         | 1.3352(16) |
| C(1)-C(2)         | 1.5249(18) |
| C(2)-C(2)#1       | 1.546(2)   |
| C(2)-C(10)        | 1.5635(18) |
| C(2)-C(3)         | 1.5640(18) |
| C(3)-O(3)         | 1.2066(17) |
| C(3)-C(4)         | 1.4671(18) |
| C(4)-C(9)         | 1.3887(19) |
| C(4)-C(5)         | 1.3956(19) |
| C(5)-C(6)         | 1.387(2)   |
| C(6)-C(7)         | 1.396(2)   |
| C(7)-C(8)         | 1.390(2)   |
| C(8)-C(9)         | 1.3926(19) |
| C(9)-C(10)        | 1.5019(19) |
| C(11)-O(2)        | 1.4483(18) |
| C(12)-Cl(1)       | 1.7471(14) |
| C(12)-Cl(1)#2     | 1.7471(14) |
| O(1)-C(1)-O(2)    | 124.00(12) |
| O(1)-C(1)-C(2)    | 126.20(12) |
| O(2)-C(1)-C(2)    | 109.80(11) |
| C(1)-C(2)-C(2)#1  | 110.11(9)  |
| C(1)-C(2)-C(10)   | 109.62(10) |
| C(2)#1-C(2)-C(10) | 115.18(13) |
| C(1)-C(2)-C(3)    | 106.87(10) |
| C(2)#1-C(2)-C(3)  | 110.76(8)  |
| C(10)-C(2)-C(3)   | 103.84(10) |
| O(3)-C(3)-C(4)    | 127.43(13) |
| O(3)-C(3)-C(2)    | 124.37(12) |
| C(4)-C(3)-C(2)    | 108.20(11) |
| C(9)-C(4)-C(5)    | 122.37(12) |
| C(9)-C(4)-C(3)    | 109.88(12) |
| C(5)-C(4)-C(3)    | 127.74(13) |
| C(6)-C(5)-C(4)    | 117.75(14) |
| C(5)-C(6)-C(7)    | 120.17(14) |
| C(8)-C(7)-C(6)    | 121.75(13) |

|                     |            |
|---------------------|------------|
| C(7)-C(8)-C(9)      | 118.31(14) |
| C(4)-C(9)-C(8)      | 119.66(13) |
| C(4)-C(9)-C(10)     | 112.47(11) |
| C(8)-C(9)-C(10)     | 127.87(13) |
| C(9)-C(10)-C(2)     | 105.21(11) |
| C(1)-O(2)-C(11)     | 115.52(11) |
| Cl(1)-C(12)-Cl(1)#2 | 111.26(13) |

---

Symmetry transformations used to generate equivalent atoms:

#1  $-x+2, y, -z+1/2$     #2  $-x+1, y, -z+1/2$

Table 4. Anisotropic displacement parameters ( $\text{\AA}^2 \times 10^3$ ) for **3a**. The anisotropic displacement factor exponent takes the form:  $-2\pi^2[ h^2 a^{*2}U^{11} + \dots + 2 h k a^* b^* U^{12} ]$

|       | $U^{11}$ | $U^{22}$ | $U^{33}$ | $U^{23}$ | $U^{13}$ | $U^{12}$ |
|-------|----------|----------|----------|----------|----------|----------|
| C(1)  | 14(1)    | 16(1)    | 11(1)    | -2(1)    | 3(1)     | -2(1)    |
| C(2)  | 10(1)    | 13(1)    | 12(1)    | -1(1)    | 2(1)     | 0(1)     |
| C(3)  | 14(1)    | 14(1)    | 13(1)    | -1(1)    | 4(1)     | 0(1)     |
| C(4)  | 13(1)    | 14(1)    | 18(1)    | 3(1)     | 5(1)     | 0(1)     |
| C(5)  | 20(1)    | 15(1)    | 25(1)    | 2(1)     | 10(1)    | 0(1)     |
| C(6)  | 21(1)    | 18(1)    | 34(1)    | 6(1)     | 14(1)    | 6(1)     |
| C(7)  | 14(1)    | 29(1)    | 31(1)    | 12(1)    | 7(1)     | 7(1)     |
| C(8)  | 13(1)    | 29(1)    | 19(1)    | 5(1)     | 2(1)     | 1(1)     |
| C(9)  | 12(1)    | 18(1)    | 16(1)    | 3(1)     | 5(1)     | 0(1)     |
| C(10) | 10(1)    | 19(1)    | 13(1)    | -1(1)    | 0(1)     | -1(1)    |
| C(11) | 39(1)    | 21(1)    | 31(1)    | 6(1)     | 24(1)    | 1(1)     |
| O(1)  | 20(1)    | 20(1)    | 21(1)    | 5(1)     | 7(1)     | 5(1)     |
| O(2)  | 23(1)    | 20(1)    | 28(1)    | 6(1)     | 17(1)    | 3(1)     |
| O(3)  | 18(1)    | 29(1)    | 27(1)    | -13(1)   | -3(1)    | 2(1)     |
| C(12) | 24(1)    | 25(1)    | 37(1)    | 0        | 7(1)     | 0        |
| Cl(1) | 42(1)    | 61(1)    | 116(1)   | -52(1)   | 37(1)    | -26(1)   |

Table 5. Hydrogen coordinates ( $\times 10^4$ ) and isotropic displacement parameters ( $\text{\AA}^2 \times 10^3$ ) for **3a**.

|        | x    | y    | z    | U(eq) |
|--------|------|------|------|-------|
| H(5)   | 8308 | 5193 | 4289 | 23    |
| H(6)   | 6578 | 5591 | 3327 | 28    |
| H(7)   | 5653 | 4815 | 1590 | 29    |
| H(8)   | 6405 | 3623 | 789  | 25    |
| H(10A) | 8598 | 3038 | 861  | 18    |
| H(10B) | 8058 | 2412 | 1743 | 18    |
| H(11A) | 8458 | 1012 | 4648 | 42    |
| H(11B) | 7912 | 1669 | 5467 | 42    |
| H(11C) | 9166 | 1555 | 5775 | 42    |
| H(12A) | 5037 | 727  | 3259 | 34    |
| H(12B) | 4963 | 727  | 1741 | 34    |



### X-ray structure of 3b

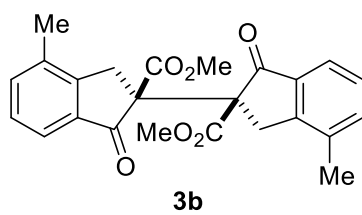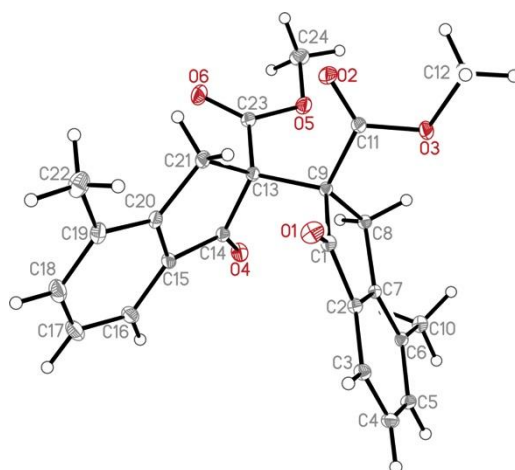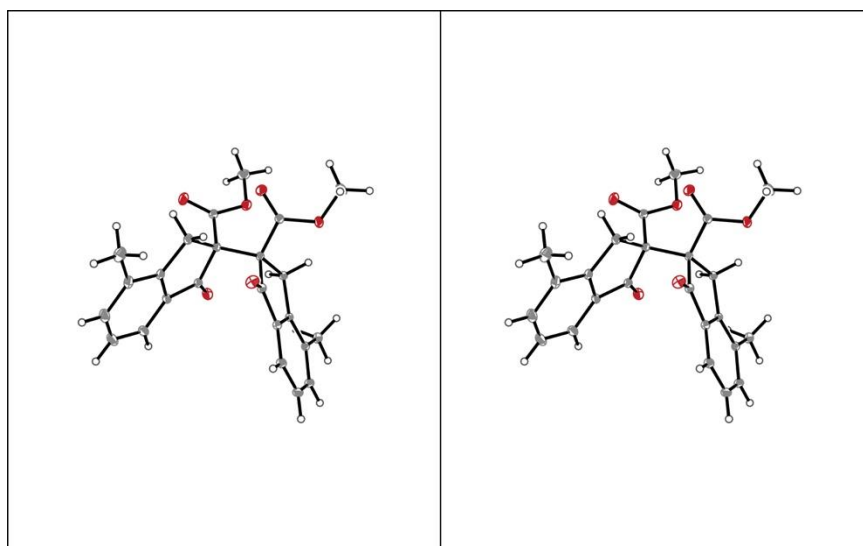

Table 1. Crystal data and structure refinement for **3b**.

|                                   |                                                |                  |
|-----------------------------------|------------------------------------------------|------------------|
| Identification code               | ys217                                          |                  |
| Empirical formula                 | C <sub>24</sub> H <sub>22</sub> O <sub>6</sub> |                  |
| Formula weight                    | 406.41                                         |                  |
| Temperature                       | 120(2) K                                       |                  |
| Wavelength                        | 0.71073 Å                                      |                  |
| Crystal system                    | Monoclinic                                     |                  |
| Space group                       | P 21/n                                         |                  |
| Unit cell dimensions              | a = 8.8734(3) Å                                | α = 90°.         |
|                                   | b = 16.0071(5) Å                               | β = 100.720(2)°. |
|                                   | c = 14.1890(5) Å                               | γ = 90°.         |
| Volume                            | 1980.20(12) Å <sup>3</sup>                     |                  |
| Z                                 | 4                                              |                  |
| Density (calculated)              | 1.363 Mg/m <sup>3</sup>                        |                  |
| Absorption coefficient            | 0.098 mm <sup>-1</sup>                         |                  |
| F(000)                            | 856                                            |                  |
| Crystal size                      | 0.716 x 0.696 x 0.328 mm <sup>3</sup>          |                  |
| Theta range for data collection   | 1.937 to 36.702°.                              |                  |
| Index ranges                      | -14 ≤ h ≤ 14, -26 ≤ k ≤ 26, -23 ≤ l ≤ 23       |                  |
| Reflections collected             | 173511                                         |                  |
| Independent reflections           | 9831 [R(int) = 0.0428]                         |                  |
| Completeness to theta = 25.242°   | 99.9 %                                         |                  |
| Absorption correction             | Semi-empirical from equivalents                |                  |
| Refinement method                 | Full-matrix least-squares on F <sup>2</sup>    |                  |
| Data / restraints / parameters    | 9831 / 0 / 275                                 |                  |
| Goodness-of-fit on F <sup>2</sup> | 1.067                                          |                  |
| Final R indices [I > 2σ(I)]       | R1 = 0.0395, wR2 = 0.1048                      |                  |
| R indices (all data)              | R1 = 0.0499, wR2 = 0.1138                      |                  |
| Extinction coefficient            | n/a                                            |                  |
| Largest diff. peak and hole       | 0.609 and -0.274 e.Å <sup>-3</sup>             |                  |

Table 2. Atomic coordinates ( $\times 10^4$ ) and equivalent isotropic displacement parameters ( $\text{\AA}^2 \times 10^3$ ) for **3b**.  $U(\text{eq})$  is defined as one third of the trace of the orthogonalized  $U^{ij}$  tensor.

|       | x        | y       | z       | $U(\text{eq})$ |
|-------|----------|---------|---------|----------------|
| O(1)  | 11527(1) | 2998(1) | 4953(1) | 19(1)          |
| O(2)  | 13084(1) | 2623(1) | 3046(1) | 23(1)          |
| O(3)  | 13113(1) | 1407(1) | 3832(1) | 17(1)          |
| O(4)  | 7251(1)  | 2213(1) | 2514(1) | 18(1)          |
| O(5)  | 10507(1) | 1815(1) | 1604(1) | 18(1)          |
| O(6)  | 9668(1)  | 3089(1) | 1098(1) | 23(1)          |
| C(1)  | 10762(1) | 2421(1) | 4565(1) | 12(1)          |
| C(2)  | 9753(1)  | 1864(1) | 4985(1) | 11(1)          |
| C(3)  | 9335(1)  | 1929(1) | 5887(1) | 14(1)          |
| C(4)  | 8395(1)  | 1308(1) | 6140(1) | 15(1)          |
| C(5)  | 7912(1)  | 642(1)  | 5511(1) | 14(1)          |
| C(6)  | 8343(1)  | 569(1)  | 4616(1) | 11(1)          |
| C(7)  | 9282(1)  | 1203(1) | 4361(1) | 10(1)          |
| C(8)  | 9937(1)  | 1258(1) | 3456(1) | 11(1)          |
| C(9)  | 10746(1) | 2123(1) | 3506(1) | 10(1)          |
| C(10) | 7825(1)  | -147(1) | 3951(1) | 15(1)          |
| C(11) | 12430(1) | 2086(1) | 3411(1) | 13(1)          |
| C(12) | 14756(1) | 1355(1) | 3888(1) | 20(1)          |
| C(13) | 9891(1)  | 2779(1) | 2777(1) | 12(1)          |
| C(14) | 8129(1)  | 2778(1) | 2803(1) | 12(1)          |
| C(15) | 7752(1)  | 3586(1) | 3191(1) | 13(1)          |
| C(16) | 6323(1)  | 3848(1) | 3363(1) | 18(1)          |
| C(17) | 6216(1)  | 4664(1) | 3671(1) | 22(1)          |
| C(18) | 7495(1)  | 5196(1) | 3803(1) | 22(1)          |
| C(19) | 8919(1)  | 4934(1) | 3632(1) | 17(1)          |
| C(20) | 9023(1)  | 4109(1) | 3317(1) | 13(1)          |
| C(21) | 10385(1) | 3699(1) | 3018(1) | 15(1)          |
| C(22) | 10280(1) | 5510(1) | 3763(1) | 24(1)          |
| C(23) | 10015(1) | 2588(1) | 1736(1) | 14(1)          |
| C(24) | 10665(1) | 1630(1) | 628(1)  | 22(1)          |

Table 3. Bond lengths [ $\text{\AA}$ ] and angles [ $^\circ$ ] for **3b**.

---

|              |            |
|--------------|------------|
| O(1)-C(1)    | 1.2156(8)  |
| O(2)-C(11)   | 1.2069(8)  |
| O(3)-C(11)   | 1.3315(8)  |
| O(3)-C(12)   | 1.4478(9)  |
| O(4)-C(14)   | 1.2148(8)  |
| O(5)-C(23)   | 1.3365(9)  |
| O(5)-C(24)   | 1.4489(9)  |
| O(6)-C(23)   | 1.2063(9)  |
| C(1)-C(2)    | 1.4665(9)  |
| C(1)-C(9)    | 1.5733(9)  |
| C(2)-C(7)    | 1.3926(9)  |
| C(2)-C(3)    | 1.4015(9)  |
| C(3)-C(4)    | 1.3872(10) |
| C(3)-H(3)    | 0.9500     |
| C(4)-C(5)    | 1.4045(10) |
| C(4)-H(4)    | 0.9500     |
| C(5)-C(6)    | 1.3963(9)  |
| C(5)-H(5)    | 0.9500     |
| C(6)-C(7)    | 1.4033(9)  |
| C(6)-C(10)   | 1.5009(9)  |
| C(7)-C(8)    | 1.5071(9)  |
| C(8)-C(9)    | 1.5549(9)  |
| C(8)-H(8A)   | 0.9900     |
| C(8)-H(8B)   | 0.9900     |
| C(9)-C(11)   | 1.5256(9)  |
| C(9)-C(13)   | 1.5674(9)  |
| C(10)-H(10A) | 0.9800     |
| C(10)-H(10B) | 0.9800     |
| C(10)-H(10C) | 0.9800     |
| C(12)-H(12A) | 0.9800     |
| C(12)-H(12B) | 0.9800     |
| C(12)-H(12C) | 0.9800     |
| C(13)-C(23)  | 1.5316(9)  |
| C(13)-C(21)  | 1.5564(9)  |
| C(13)-C(14)  | 1.5710(9)  |
| C(14)-C(15)  | 1.4680(9)  |

|                  |            |
|------------------|------------|
| C(15)-C(20)      | 1.3903(10) |
| C(15)-C(16)      | 1.3993(10) |
| C(16)-C(17)      | 1.3873(11) |
| C(16)-H(16)      | 0.9500     |
| C(17)-C(18)      | 1.4024(13) |
| C(17)-H(17)      | 0.9500     |
| C(18)-C(19)      | 1.3952(11) |
| C(18)-H(18)      | 0.9500     |
| C(19)-C(20)      | 1.4023(10) |
| C(19)-C(22)      | 1.5038(12) |
| C(20)-C(21)      | 1.5039(10) |
| C(21)-H(21A)     | 0.9900     |
| C(21)-H(21B)     | 0.9900     |
| C(22)-H(22A)     | 0.9800     |
| C(22)-H(22B)     | 0.9800     |
| C(22)-H(22C)     | 0.9800     |
| C(24)-H(24A)     | 0.9800     |
| C(24)-H(24B)     | 0.9800     |
| C(24)-H(24C)     | 0.9800     |
| C(11)-O(3)-C(12) | 116.16(6)  |
| C(23)-O(5)-C(24) | 114.57(6)  |
| O(1)-C(1)-C(2)   | 127.60(6)  |
| O(1)-C(1)-C(9)   | 124.54(6)  |
| C(2)-C(1)-C(9)   | 107.82(5)  |
| C(7)-C(2)-C(3)   | 122.56(6)  |
| C(7)-C(2)-C(1)   | 109.72(5)  |
| C(3)-C(2)-C(1)   | 127.67(6)  |
| C(4)-C(3)-C(2)   | 117.17(6)  |
| C(4)-C(3)-H(3)   | 121.4      |
| C(2)-C(3)-H(3)   | 121.4      |
| C(3)-C(4)-C(5)   | 120.42(6)  |
| C(3)-C(4)-H(4)   | 119.8      |
| C(5)-C(4)-H(4)   | 119.8      |
| C(6)-C(5)-C(4)   | 122.60(6)  |
| C(6)-C(5)-H(5)   | 118.7      |
| C(4)-C(5)-H(5)   | 118.7      |
| C(5)-C(6)-C(7)   | 116.73(6)  |
| C(5)-C(6)-C(10)  | 122.19(6)  |

|                     |           |
|---------------------|-----------|
| C(7)-C(6)-C(10)     | 121.08(6) |
| C(2)-C(7)-C(6)      | 120.51(6) |
| C(2)-C(7)-C(8)      | 112.27(5) |
| C(6)-C(7)-C(8)      | 127.19(5) |
| C(7)-C(8)-C(9)      | 105.17(5) |
| C(7)-C(8)-H(8A)     | 110.7     |
| C(9)-C(8)-H(8A)     | 110.7     |
| C(7)-C(8)-H(8B)     | 110.7     |
| C(9)-C(8)-H(8B)     | 110.7     |
| H(8A)-C(8)-H(8B)    | 108.8     |
| C(11)-C(9)-C(8)     | 114.40(5) |
| C(11)-C(9)-C(13)    | 109.21(5) |
| C(8)-C(9)-C(13)     | 113.79(5) |
| C(11)-C(9)-C(1)     | 105.14(5) |
| C(8)-C(9)-C(1)      | 103.61(5) |
| C(13)-C(9)-C(1)     | 110.17(5) |
| C(6)-C(10)-H(10A)   | 109.5     |
| C(6)-C(10)-H(10B)   | 109.5     |
| H(10A)-C(10)-H(10B) | 109.5     |
| C(6)-C(10)-H(10C)   | 109.5     |
| H(10A)-C(10)-H(10C) | 109.5     |
| H(10B)-C(10)-H(10C) | 109.5     |
| O(2)-C(11)-O(3)     | 123.98(6) |
| O(2)-C(11)-C(9)     | 124.60(6) |
| O(3)-C(11)-C(9)     | 111.32(5) |
| O(3)-C(12)-H(12A)   | 109.5     |
| O(3)-C(12)-H(12B)   | 109.5     |
| H(12A)-C(12)-H(12B) | 109.5     |
| O(3)-C(12)-H(12C)   | 109.5     |
| H(12A)-C(12)-H(12C) | 109.5     |
| H(12B)-C(12)-H(12C) | 109.5     |
| C(23)-C(13)-C(21)   | 109.45(5) |
| C(23)-C(13)-C(9)    | 112.97(5) |
| C(21)-C(13)-C(9)    | 114.03(5) |
| C(23)-C(13)-C(14)   | 105.78(5) |
| C(21)-C(13)-C(14)   | 103.67(5) |
| C(9)-C(13)-C(14)    | 110.23(5) |
| O(4)-C(14)-C(15)    | 127.29(6) |

|                     |           |
|---------------------|-----------|
| O(4)-C(14)-C(13)    | 124.87(6) |
| C(15)-C(14)-C(13)   | 107.79(5) |
| C(20)-C(15)-C(16)   | 122.50(6) |
| C(20)-C(15)-C(14)   | 110.03(6) |
| C(16)-C(15)-C(14)   | 127.35(6) |
| C(17)-C(16)-C(15)   | 117.03(7) |
| C(17)-C(16)-H(16)   | 121.5     |
| C(15)-C(16)-H(16)   | 121.5     |
| C(16)-C(17)-C(18)   | 120.85(7) |
| C(16)-C(17)-H(17)   | 119.6     |
| C(18)-C(17)-H(17)   | 119.6     |
| C(19)-C(18)-C(17)   | 122.08(7) |
| C(19)-C(18)-H(18)   | 119.0     |
| C(17)-C(18)-H(18)   | 119.0     |
| C(18)-C(19)-C(20)   | 117.00(7) |
| C(18)-C(19)-C(22)   | 121.79(7) |
| C(20)-C(19)-C(22)   | 121.20(7) |
| C(15)-C(20)-C(19)   | 120.55(6) |
| C(15)-C(20)-C(21)   | 112.10(6) |
| C(19)-C(20)-C(21)   | 127.24(6) |
| C(20)-C(21)-C(13)   | 105.48(5) |
| C(20)-C(21)-H(21A)  | 110.6     |
| C(13)-C(21)-H(21A)  | 110.6     |
| C(20)-C(21)-H(21B)  | 110.6     |
| C(13)-C(21)-H(21B)  | 110.6     |
| H(21A)-C(21)-H(21B) | 108.8     |
| C(19)-C(22)-H(22A)  | 109.5     |
| C(19)-C(22)-H(22B)  | 109.5     |
| H(22A)-C(22)-H(22B) | 109.5     |
| C(19)-C(22)-H(22C)  | 109.5     |
| H(22A)-C(22)-H(22C) | 109.5     |
| H(22B)-C(22)-H(22C) | 109.5     |
| O(6)-C(23)-O(5)     | 123.64(7) |
| O(6)-C(23)-C(13)    | 122.53(6) |
| O(5)-C(23)-C(13)    | 113.81(6) |
| O(5)-C(24)-H(24A)   | 109.5     |
| O(5)-C(24)-H(24B)   | 109.5     |
| H(24A)-C(24)-H(24B) | 109.5     |

|                     |       |
|---------------------|-------|
| O(5)-C(24)-H(24C)   | 109.5 |
| H(24A)-C(24)-H(24C) | 109.5 |
| H(24B)-C(24)-H(24C) | 109.5 |

---

Symmetry transformations used to generate equivalent atoms:



Table 4. Anisotropic displacement parameters ( $\text{\AA}^2 \times 10^3$ ) for **3b**. The anisotropic displacement factor exponent takes the form:  $-2\pi^2[h^2 a^{*2}U^{11} + \dots + 2 h k a^* b^* U^{12}]$

|       | U <sup>11</sup> | U <sup>22</sup> | U <sup>33</sup> | U <sup>23</sup> | U <sup>13</sup> | U <sup>12</sup> |
|-------|-----------------|-----------------|-----------------|-----------------|-----------------|-----------------|
| O(1)  | 22(1)           | 16(1)           | 18(1)           | -4(1)           | 2(1)            | -8(1)           |
| O(2)  | 14(1)           | 22(1)           | 35(1)           | 13(1)           | 9(1)            | 0(1)            |
| O(3)  | 11(1)           | 17(1)           | 24(1)           | 6(1)            | 2(1)            | 3(1)            |
| O(4)  | 13(1)           | 16(1)           | 24(1)           | -1(1)           | 1(1)            | -2(1)           |
| O(5)  | 26(1)           | 16(1)           | 14(1)           | 1(1)            | 7(1)            | 3(1)            |
| O(6)  | 30(1)           | 22(1)           | 17(1)           | 8(1)            | 5(1)            | 7(1)            |
| C(1)  | 12(1)           | 11(1)           | 13(1)           | -1(1)           | 1(1)            | -1(1)           |
| C(2)  | 12(1)           | 11(1)           | 11(1)           | -1(1)           | 2(1)            | 0(1)            |
| C(3)  | 15(1)           | 14(1)           | 12(1)           | -2(1)           | 3(1)            | 1(1)            |
| C(4)  | 15(1)           | 18(1)           | 13(1)           | 0(1)            | 5(1)            | 1(1)            |
| C(5)  | 12(1)           | 15(1)           | 14(1)           | 2(1)            | 3(1)            | 0(1)            |
| C(6)  | 10(1)           | 11(1)           | 12(1)           | 1(1)            | 1(1)            | 0(1)            |
| C(7)  | 10(1)           | 10(1)           | 10(1)           | 0(1)            | 2(1)            | 0(1)            |
| C(8)  | 12(1)           | 10(1)           | 11(1)           | -1(1)           | 3(1)            | -1(1)           |
| C(9)  | 10(1)           | 10(1)           | 12(1)           | 1(1)            | 2(1)            | 0(1)            |
| C(10) | 15(1)           | 12(1)           | 17(1)           | -2(1)           | 1(1)            | -2(1)           |
| C(11) | 11(1)           | 13(1)           | 14(1)           | 1(1)            | 2(1)            | 1(1)            |
| C(12) | 11(1)           | 24(1)           | 25(1)           | 0(1)            | 2(1)            | 4(1)            |
| C(13) | 11(1)           | 10(1)           | 14(1)           | 2(1)            | 2(1)            | 0(1)            |
| C(14) | 11(1)           | 12(1)           | 13(1)           | 2(1)            | 2(1)            | 1(1)            |
| C(15) | 14(1)           | 13(1)           | 13(1)           | 1(1)            | 2(1)            | 2(1)            |
| C(16) | 16(1)           | 20(1)           | 18(1)           | 0(1)            | 4(1)            | 4(1)            |
| C(17) | 23(1)           | 23(1)           | 22(1)           | -2(1)           | 6(1)            | 8(1)            |
| C(18) | 29(1)           | 17(1)           | 19(1)           | -3(1)           | 3(1)            | 7(1)            |
| C(19) | 24(1)           | 12(1)           | 14(1)           | 0(1)            | 1(1)            | 2(1)            |
| C(20) | 16(1)           | 11(1)           | 12(1)           | 2(1)            | 1(1)            | 2(1)            |
| C(21) | 14(1)           | 10(1)           | 19(1)           | 2(1)            | 4(1)            | -1(1)           |
| C(22) | 32(1)           | 15(1)           | 24(1)           | -1(1)           | 2(1)            | -4(1)           |
| C(23) | 13(1)           | 15(1)           | 15(1)           | 2(1)            | 3(1)            | 1(1)            |
| C(24) | 29(1)           | 22(1)           | 16(1)           | -2(1)           | 10(1)           | -1(1)           |

Table 5. Hydrogen coordinates ( $\times 10^4$ ) and isotropic displacement parameters ( $\text{\AA}^2 \times 10^{-3}$ ) for **3b**.

|        | x     | y    | z    | U(eq) |
|--------|-------|------|------|-------|
| H(3)   | 9681  | 2379 | 6308 | 17    |
| H(4)   | 8076  | 1332 | 6742 | 18    |
| H(5)   | 7268  | 225  | 5701 | 16    |
| H(8A)  | 9112  | 1223 | 2883 | 13    |
| H(8B)  | 10680 | 802  | 3430 | 13    |
| H(10A) | 7192  | -528 | 4252 | 22    |
| H(10B) | 8723  | -447 | 3815 | 22    |
| H(10C) | 7222  | 68   | 3350 | 22    |
| H(12A) | 15011 | 1518 | 3270 | 31    |
| H(12B) | 15099 | 781  | 4040 | 31    |
| H(12C) | 15271 | 1732 | 4391 | 31    |
| H(16)  | 5464  | 3482 | 3273 | 21    |
| H(17)  | 5265  | 4866 | 3795 | 27    |
| H(18)  | 7387  | 5752 | 4015 | 26    |
| H(21A) | 11289 | 3720 | 3545 | 18    |
| H(21B) | 10646 | 3982 | 2448 | 18    |
| H(22A) | 9967  | 6070 | 3931 | 36    |
| H(22B) | 10680 | 5538 | 3165 | 36    |
| H(22C) | 11080 | 5299 | 4279 | 36    |
| H(24A) | 9668  | 1693 | 201  | 32    |
| H(24B) | 11030 | 1055 | 592  | 32    |
| H(24C) | 11404 | 2017 | 430  | 32    |

Table 6. Torsion angles [°] for **3b**.

---

|                       |            |
|-----------------------|------------|
| O(1)-C(1)-C(2)-C(7)   | -170.26(7) |
| C(9)-C(1)-C(2)-C(7)   | 7.61(7)    |
| O(1)-C(1)-C(2)-C(3)   | 7.02(11)   |
| C(9)-C(1)-C(2)-C(3)   | -175.11(6) |
| C(7)-C(2)-C(3)-C(4)   | -1.11(10)  |
| C(1)-C(2)-C(3)-C(4)   | -178.07(6) |
| C(2)-C(3)-C(4)-C(5)   | 0.77(10)   |
| C(3)-C(4)-C(5)-C(6)   | 0.10(10)   |
| C(4)-C(5)-C(6)-C(7)   | -0.66(9)   |
| C(4)-C(5)-C(6)-C(10)  | 179.80(6)  |
| C(3)-C(2)-C(7)-C(6)   | 0.56(9)    |
| C(1)-C(2)-C(7)-C(6)   | 178.00(5)  |
| C(3)-C(2)-C(7)-C(8)   | -177.60(6) |
| C(1)-C(2)-C(7)-C(8)   | -0.16(7)   |
| C(5)-C(6)-C(7)-C(2)   | 0.33(9)    |
| C(10)-C(6)-C(7)-C(2)  | 179.88(6)  |
| C(5)-C(6)-C(7)-C(8)   | 178.19(6)  |
| C(10)-C(6)-C(7)-C(8)  | -2.26(10)  |
| C(2)-C(7)-C(8)-C(9)   | -7.35(7)   |
| C(6)-C(7)-C(8)-C(9)   | 174.64(6)  |
| C(7)-C(8)-C(9)-C(11)  | 124.97(5)  |
| C(7)-C(8)-C(9)-C(13)  | -108.54(6) |
| C(7)-C(8)-C(9)-C(1)   | 11.09(6)   |
| O(1)-C(1)-C(9)-C(11)  | 45.99(8)   |
| C(2)-C(1)-C(9)-C(11)  | -131.96(5) |
| O(1)-C(1)-C(9)-C(8)   | 166.37(6)  |
| C(2)-C(1)-C(9)-C(8)   | -11.58(6)  |
| O(1)-C(1)-C(9)-C(13)  | -71.55(8)  |
| C(2)-C(1)-C(9)-C(13)  | 110.49(6)  |
| C(12)-O(3)-C(11)-O(2) | 3.66(11)   |
| C(12)-O(3)-C(11)-C(9) | -172.86(6) |
| C(8)-C(9)-C(11)-O(2)  | 147.81(7)  |
| C(13)-C(9)-C(11)-O(2) | 18.98(9)   |
| C(1)-C(9)-C(11)-O(2)  | -99.21(8)  |
| C(8)-C(9)-C(11)-O(3)  | -35.70(8)  |
| C(13)-C(9)-C(11)-O(3) | -164.53(5) |

|                         |            |
|-------------------------|------------|
| C(1)-C(9)-C(11)-O(3)    | 77.28(6)   |
| C(11)-C(9)-C(13)-C(23)  | 57.44(7)   |
| C(8)-C(9)-C(13)-C(23)   | -71.73(7)  |
| C(1)-C(9)-C(13)-C(23)   | 172.44(5)  |
| C(11)-C(9)-C(13)-C(21)  | -68.35(7)  |
| C(8)-C(9)-C(13)-C(21)   | 162.48(5)  |
| C(1)-C(9)-C(13)-C(21)   | 46.65(7)   |
| C(11)-C(9)-C(13)-C(14)  | 175.54(5)  |
| C(8)-C(9)-C(13)-C(14)   | 46.37(7)   |
| C(1)-C(9)-C(13)-C(14)   | -69.46(6)  |
| C(23)-C(13)-C(14)-O(4)  | 53.23(8)   |
| C(21)-C(13)-C(14)-O(4)  | 168.37(7)  |
| C(9)-C(13)-C(14)-O(4)   | -69.20(8)  |
| C(23)-C(13)-C(14)-C(15) | -124.36(6) |
| C(21)-C(13)-C(14)-C(15) | -9.22(7)   |
| C(9)-C(13)-C(14)-C(15)  | 113.22(6)  |
| O(4)-C(14)-C(15)-C(20)  | -171.63(7) |
| C(13)-C(14)-C(15)-C(20) | 5.88(7)    |
| O(4)-C(14)-C(15)-C(16)  | 4.24(12)   |
| C(13)-C(14)-C(15)-C(16) | -178.24(6) |
| C(20)-C(15)-C(16)-C(17) | -0.12(11)  |
| C(14)-C(15)-C(16)-C(17) | -175.53(7) |
| C(15)-C(16)-C(17)-C(18) | -0.11(12)  |
| C(16)-C(17)-C(18)-C(19) | 0.04(13)   |
| C(17)-C(18)-C(19)-C(20) | 0.26(11)   |
| C(17)-C(18)-C(19)-C(22) | 179.20(8)  |
| C(16)-C(15)-C(20)-C(19) | 0.43(10)   |
| C(14)-C(15)-C(20)-C(19) | 176.54(6)  |
| C(16)-C(15)-C(20)-C(21) | -175.90(6) |
| C(14)-C(15)-C(20)-C(21) | 0.21(8)    |
| C(18)-C(19)-C(20)-C(15) | -0.48(10)  |
| C(22)-C(19)-C(20)-C(15) | -179.43(7) |
| C(18)-C(19)-C(20)-C(21) | 175.25(7)  |
| C(22)-C(19)-C(20)-C(21) | -3.69(11)  |
| C(15)-C(20)-C(21)-C(13) | -6.19(7)   |
| C(19)-C(20)-C(21)-C(13) | 177.77(6)  |
| C(23)-C(13)-C(21)-C(20) | 121.55(6)  |
| C(9)-C(13)-C(21)-C(20)  | -110.82(6) |

|                         |            |
|-------------------------|------------|
| C(14)-C(13)-C(21)-C(20) | 9.05(6)    |
| C(24)-O(5)-C(23)-O(6)   | 2.70(11)   |
| C(24)-O(5)-C(23)-C(13)  | -178.61(6) |
| C(21)-C(13)-C(23)-O(6)  | -38.61(9)  |
| C(9)-C(13)-C(23)-O(6)   | -166.83(7) |
| C(14)-C(13)-C(23)-O(6)  | 72.51(8)   |
| C(21)-C(13)-C(23)-O(5)  | 142.68(6)  |
| C(9)-C(13)-C(23)-O(5)   | 14.46(8)   |
| C(14)-C(13)-C(23)-O(5)  | -106.20(6) |

---

Symmetry transformations used to generate equivalent atoms:

Table 7. Hydrogen bonds for **3b** [ $\text{\AA}$  and  $^\circ$ ].

| D-H...A               | d(D-H) | d(H...A) | d(D...A)   | $\angle(\text{DHA})$ |
|-----------------------|--------|----------|------------|----------------------|
| C(12)-H(12C)...O(6)#1 | 0.98   | 2.59     | 3.2739(10) | 126.8                |
| C(12)-H(12C)...O(6)#1 | 0.98   | 2.59     | 3.2739(10) | 126.8                |
| C(12)-H(12C)...O(6)#1 | 0.98   | 2.59     | 3.2739(10) | 126.8                |
| C(12)-H(12C)...O(6)#1 | 0.98   | 2.59     | 3.2739(10) | 126.8                |
| C(12)-H(12C)...O(6)#1 | 0.98   | 2.59     | 3.2739(10) | 126.8                |

Symmetry transformations used to generate equivalent atoms:

#1  $x+1/2, -y+1/2, z+1/2$

Table 2, entry 1

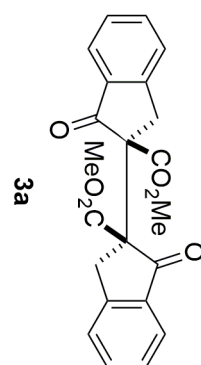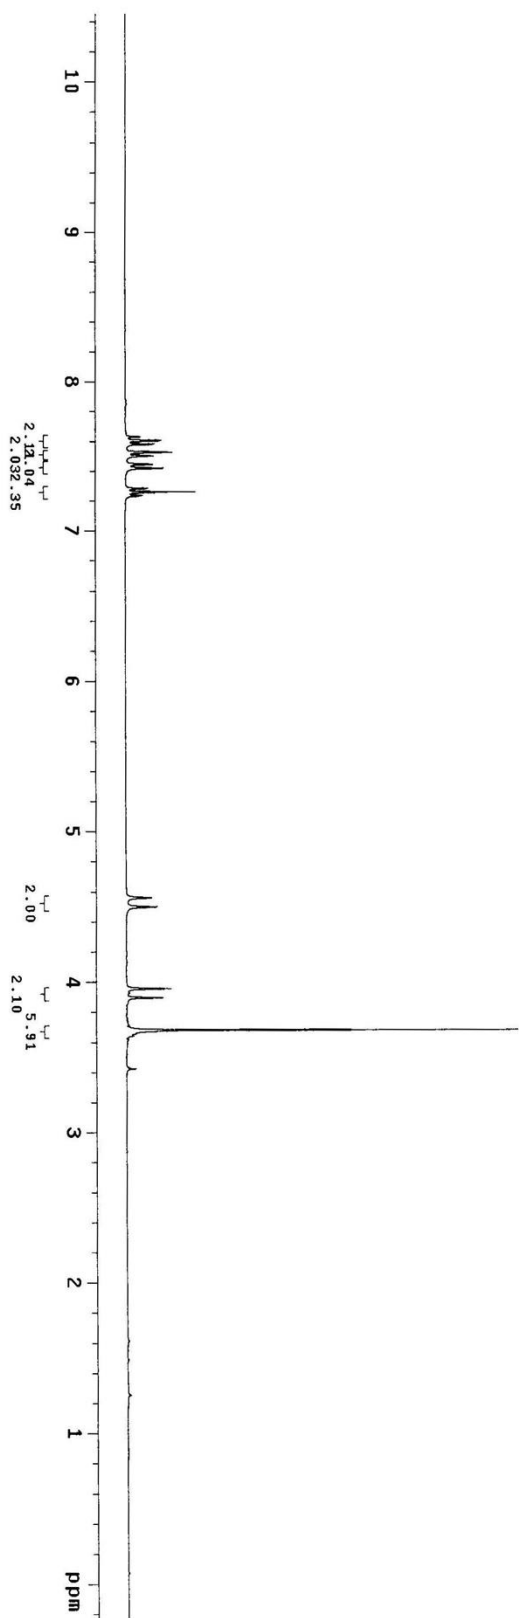

Table 2, entry 1

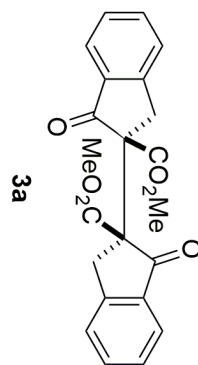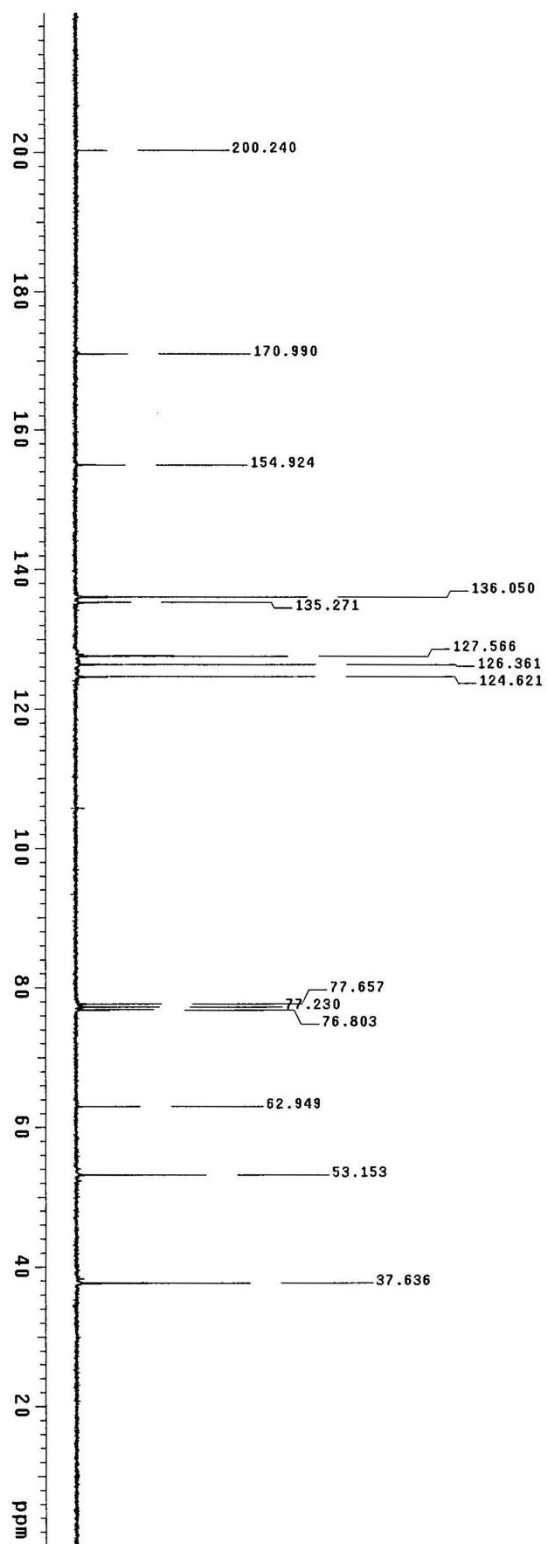



Table 2, entry 1

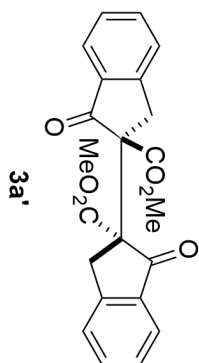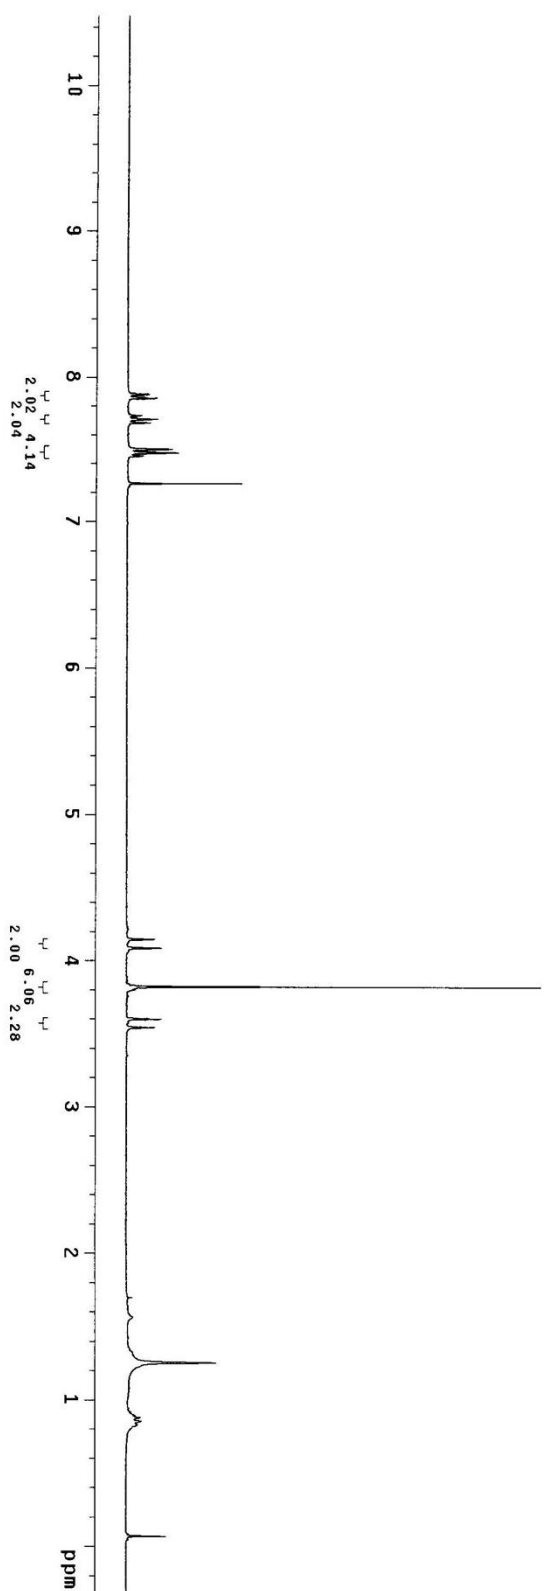

Table 2, entry 1

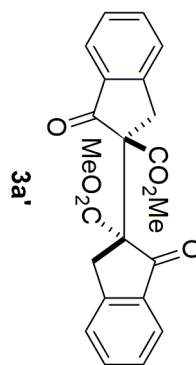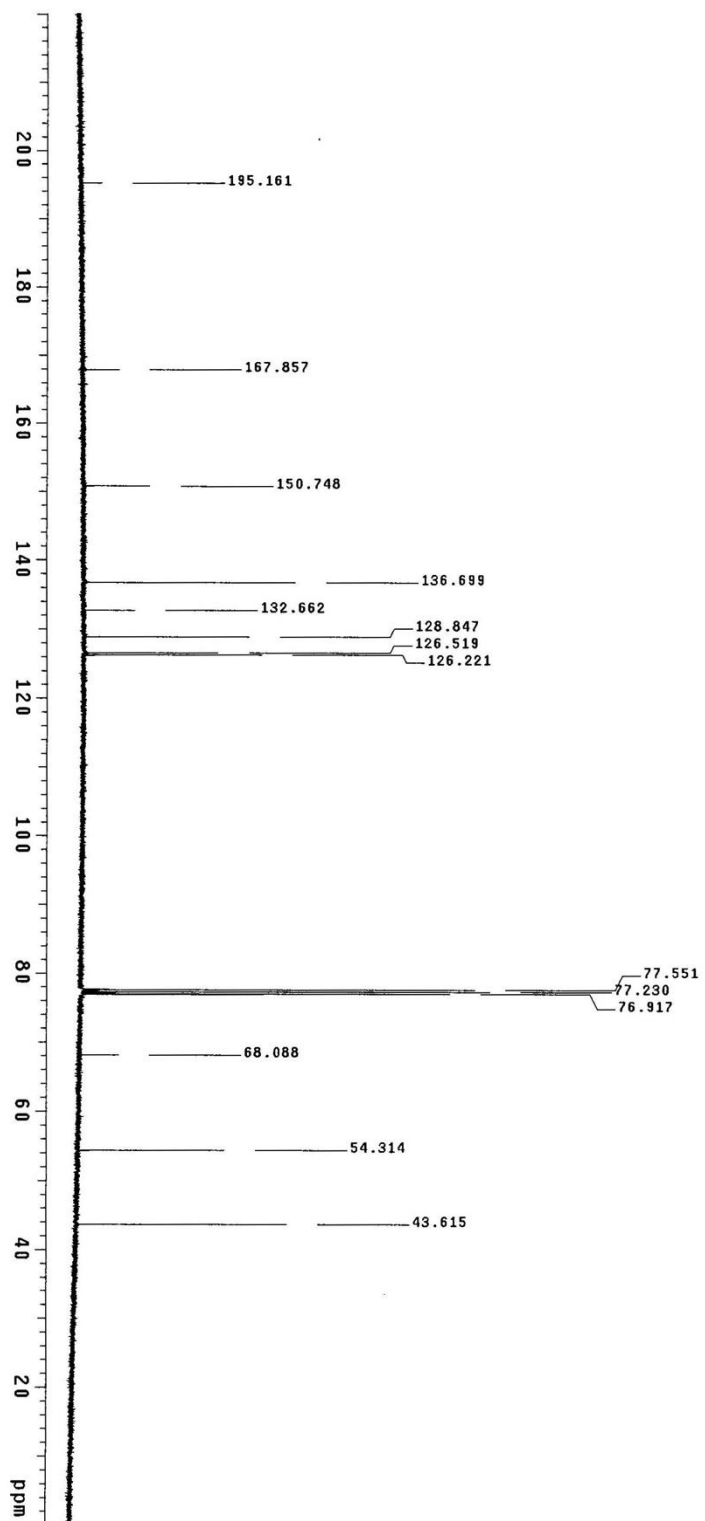

Table 2, entry 2

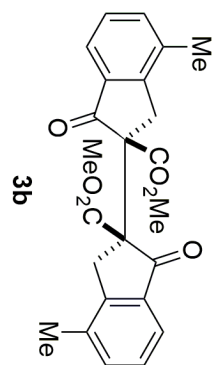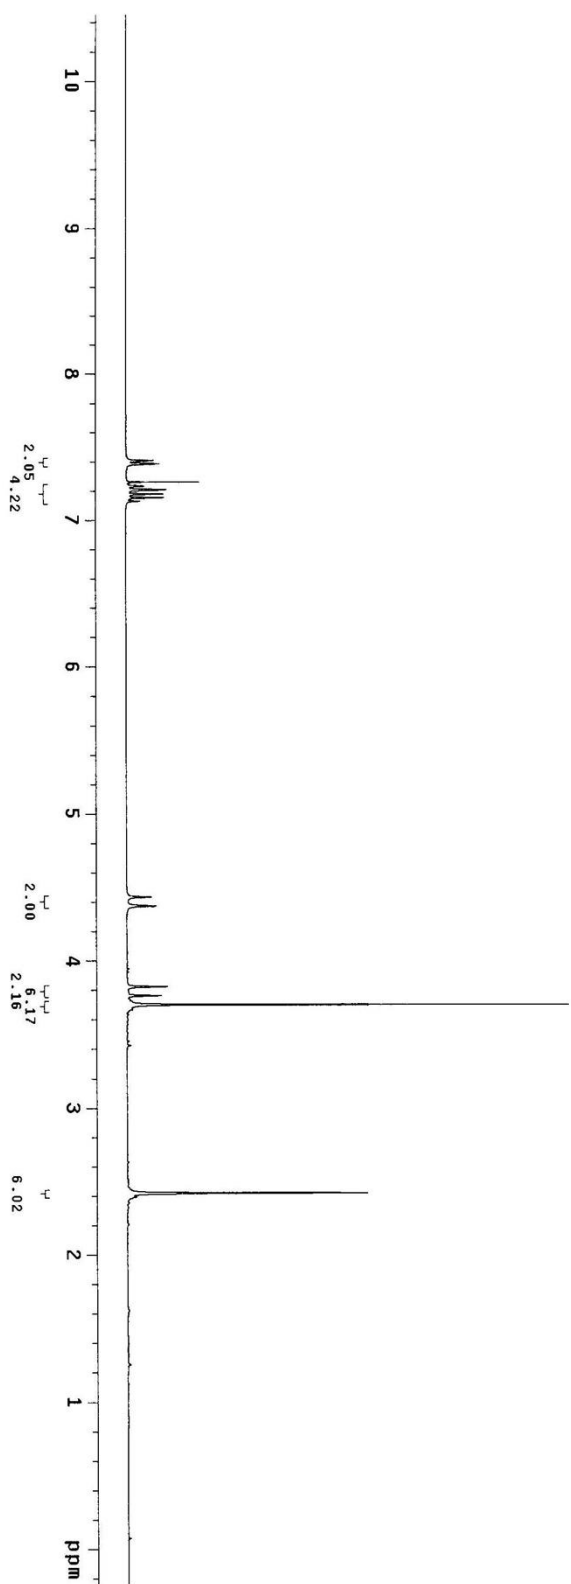

Table 2, entry 2

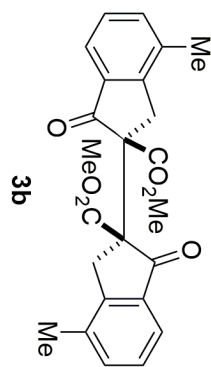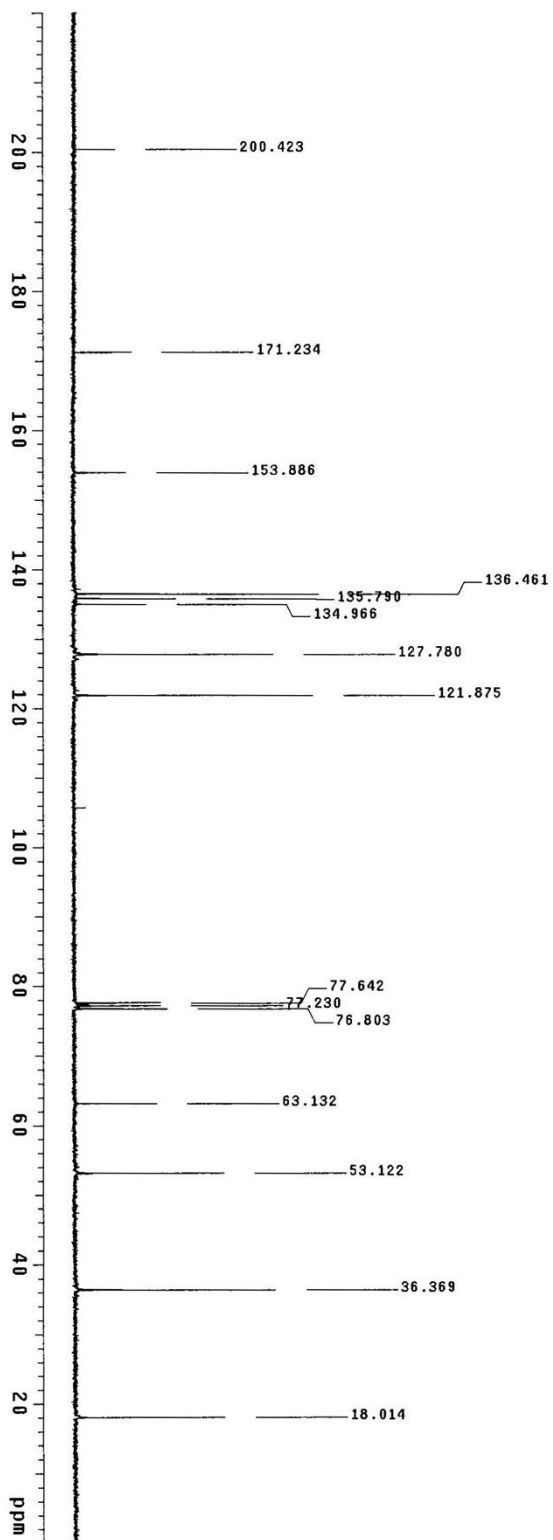

Table 2, entry 3

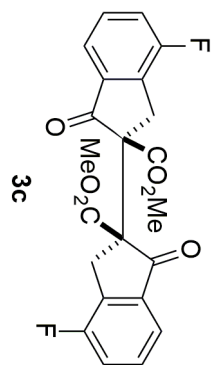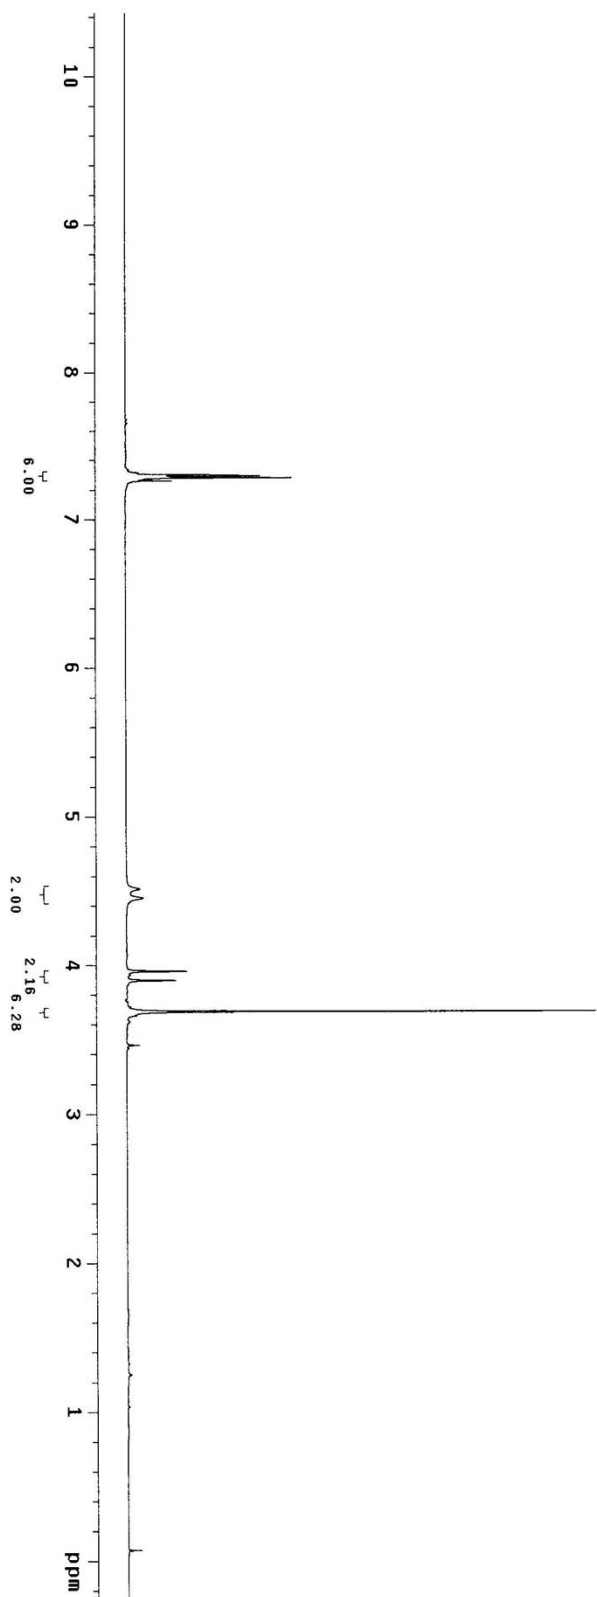

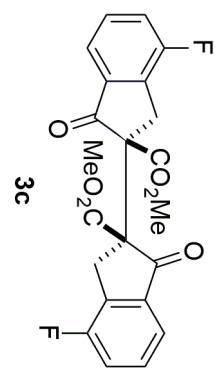

Table 2, entry 3

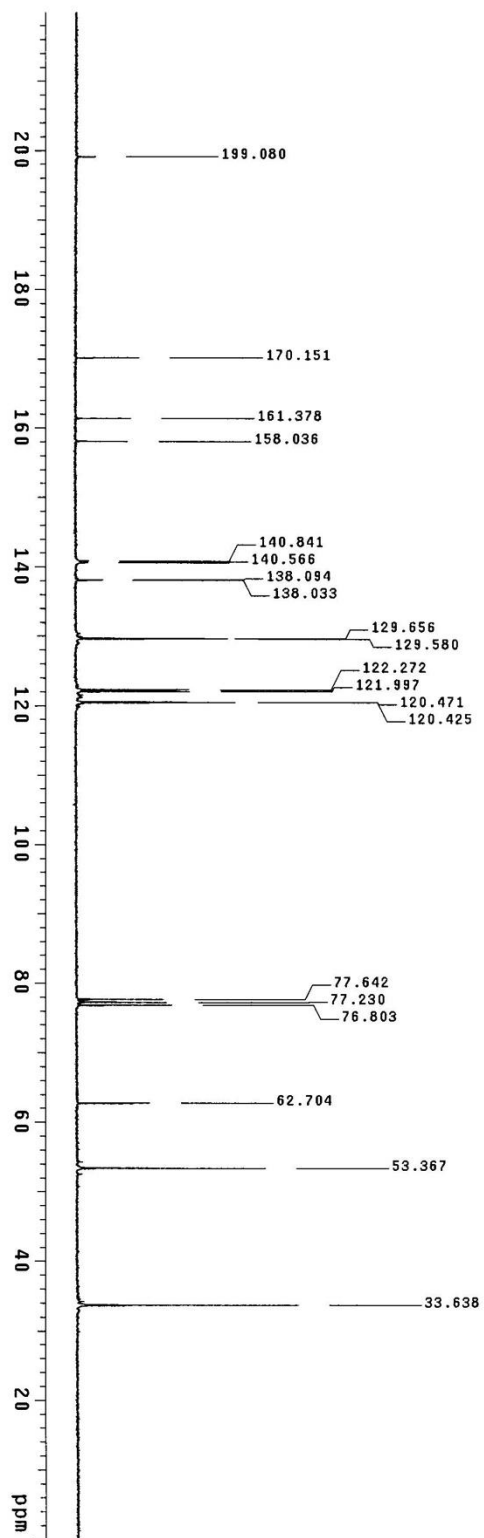

Table 2, entry 4

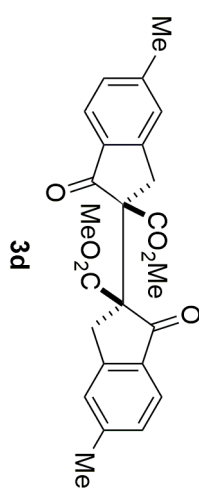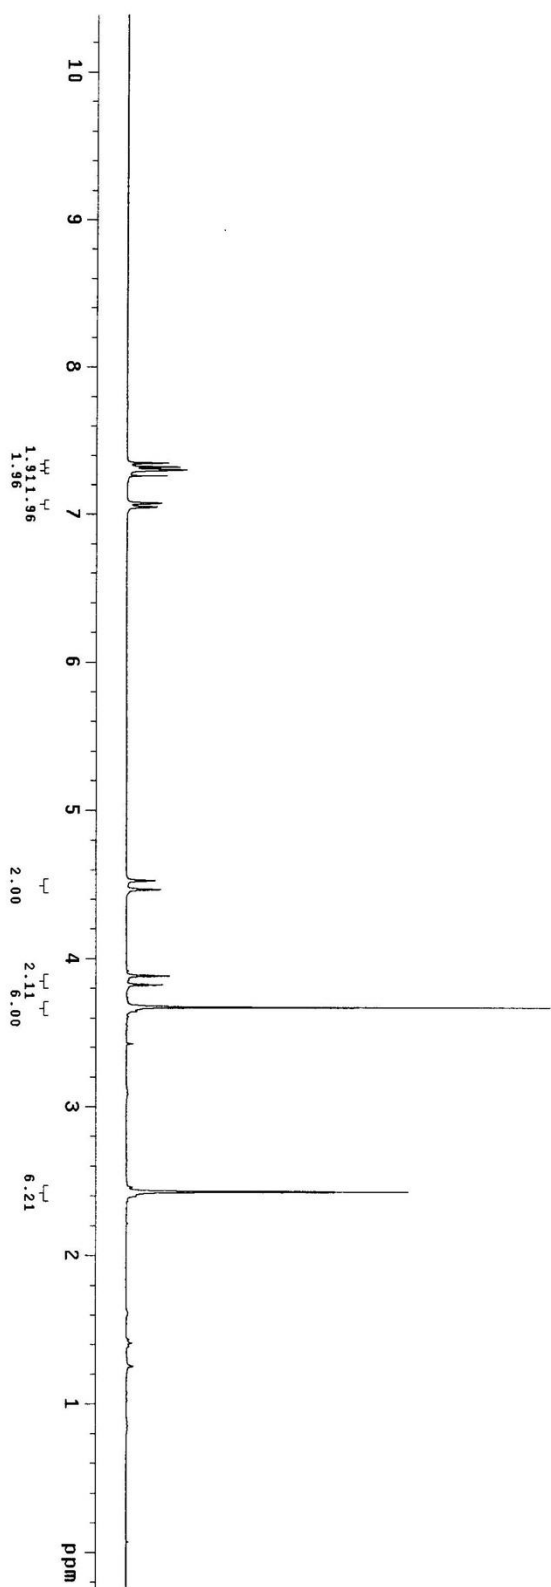

Table 2, entry 4

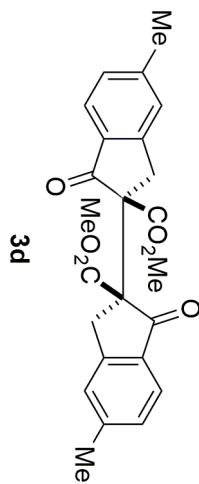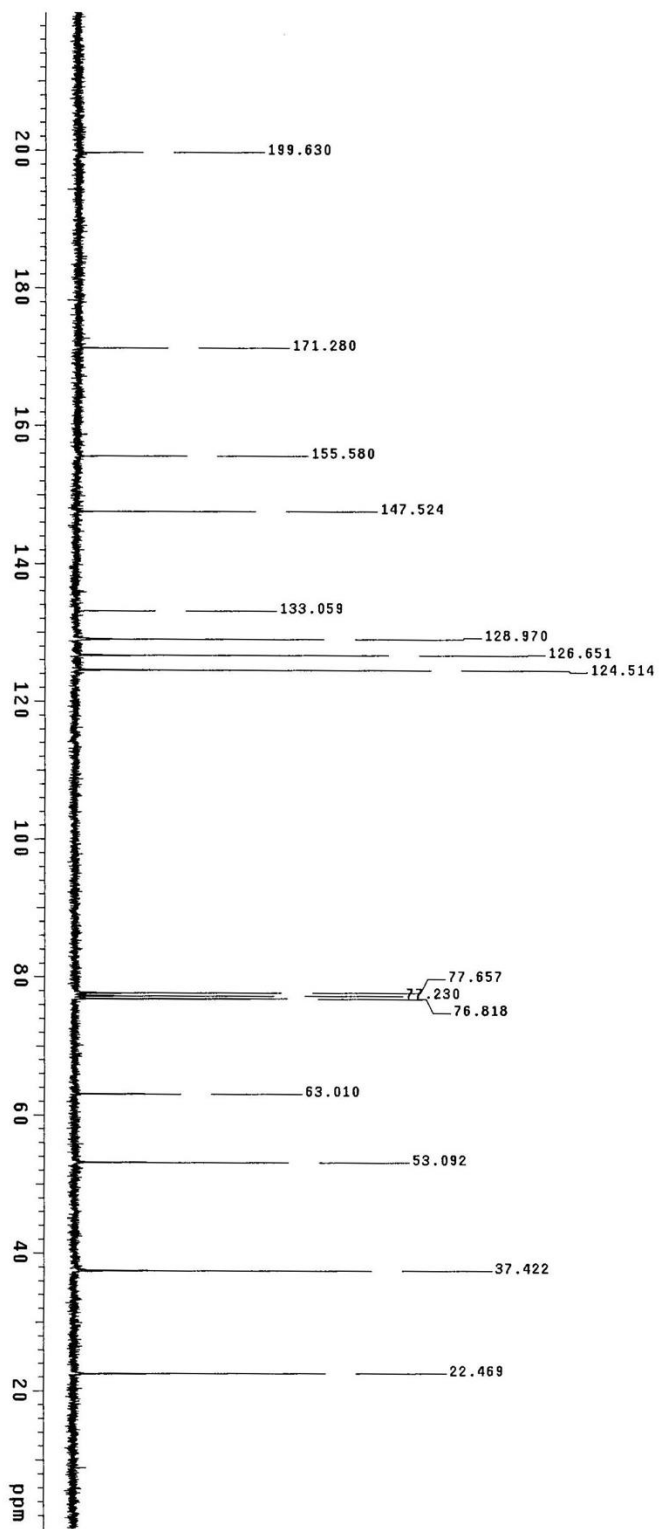



Table 2, entry 5

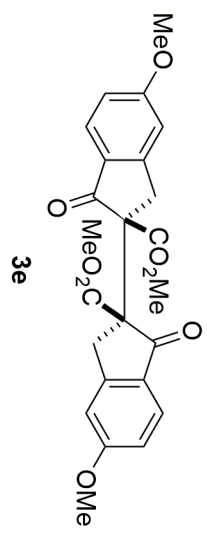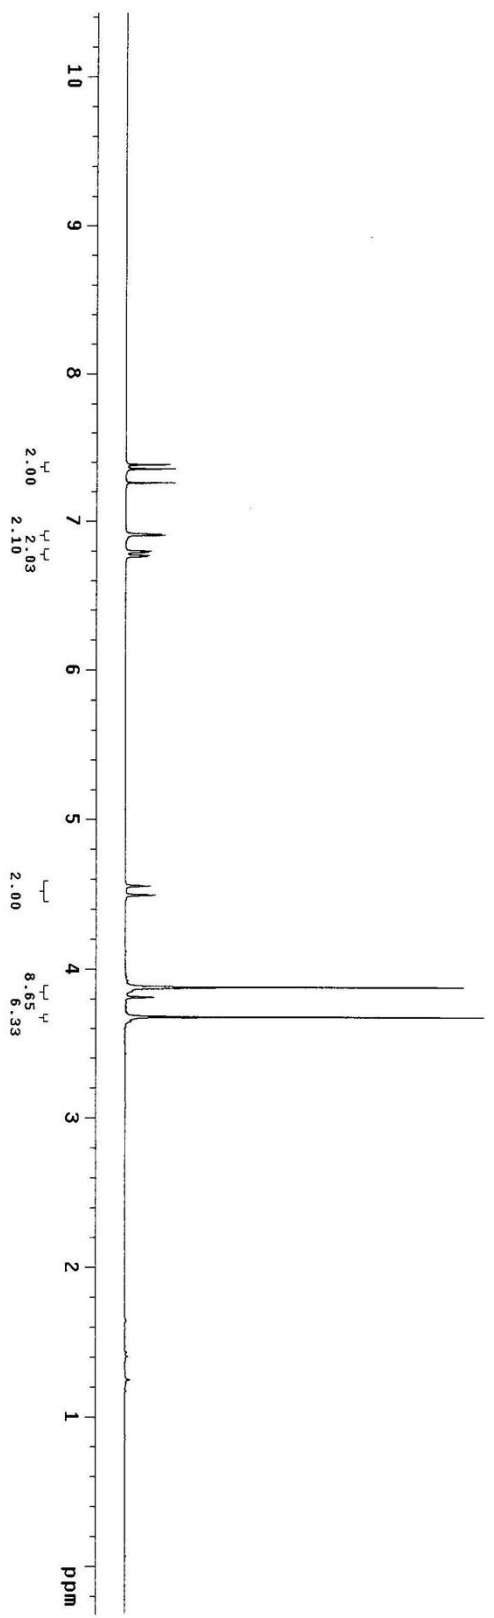

Table 2, entry 5

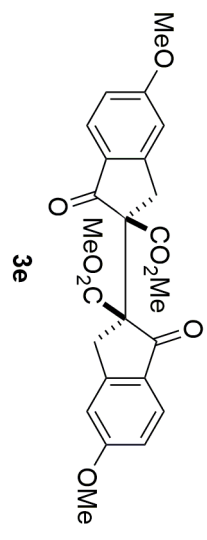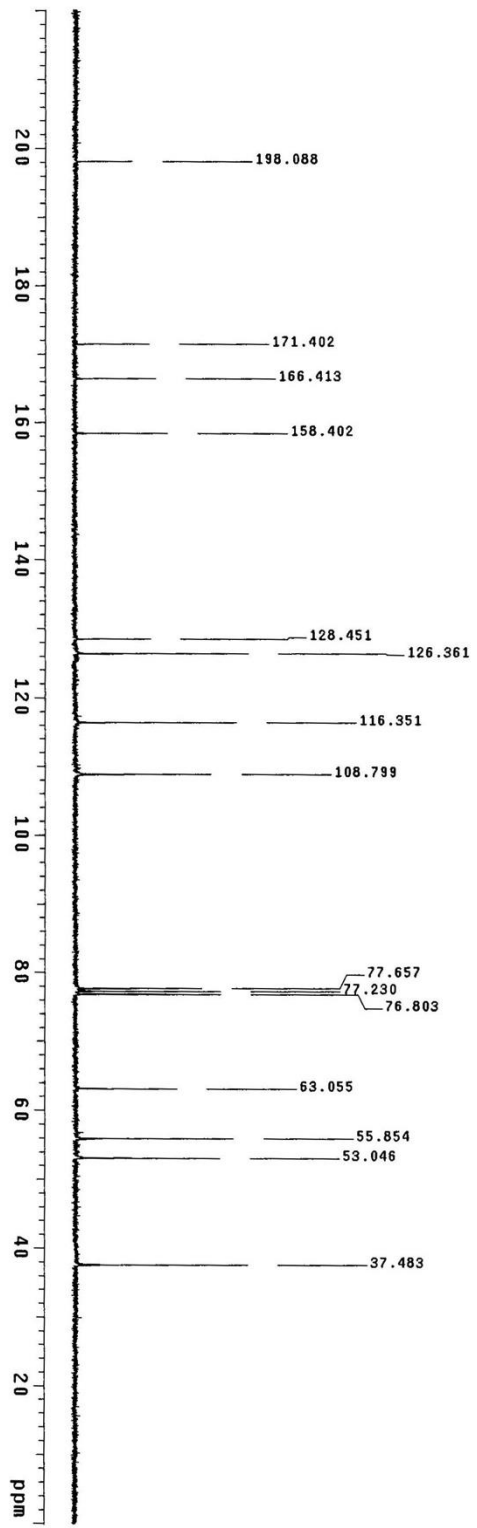

Table 2, entry 6

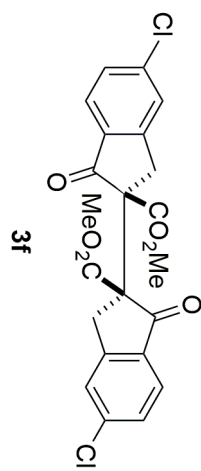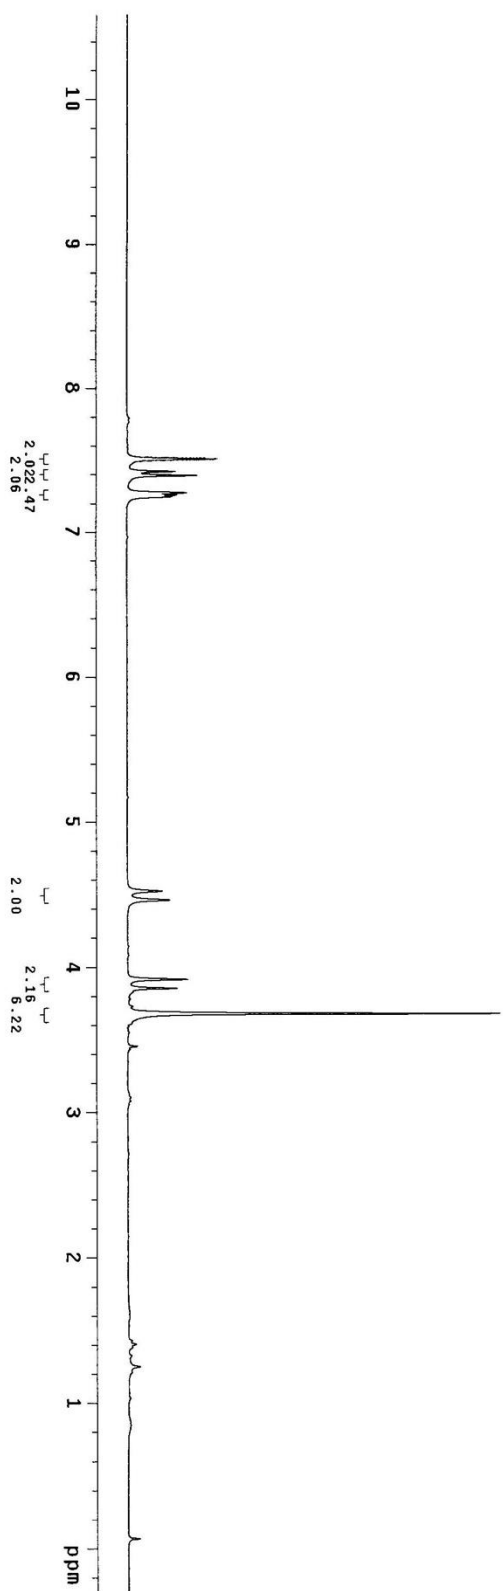

Table 2, entry 6

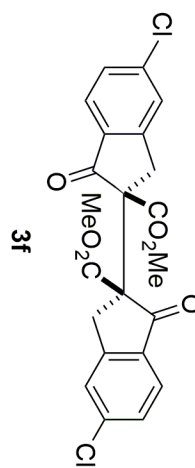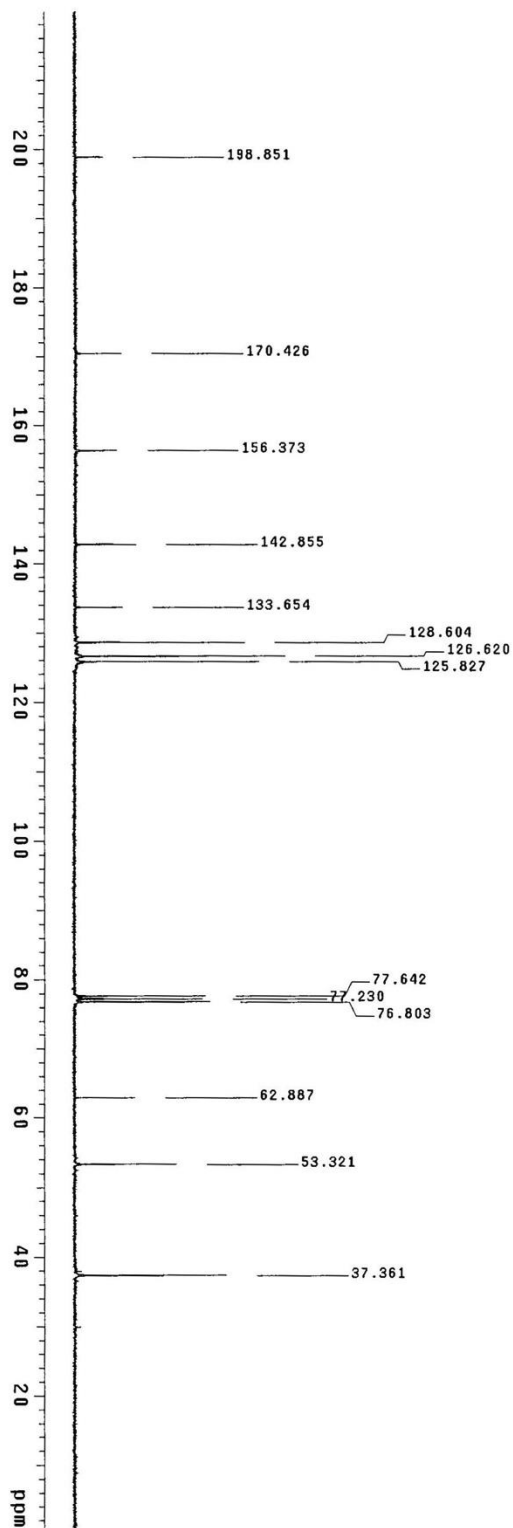

Table 2, entry 7

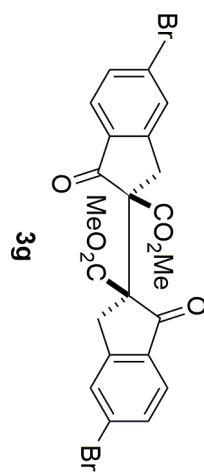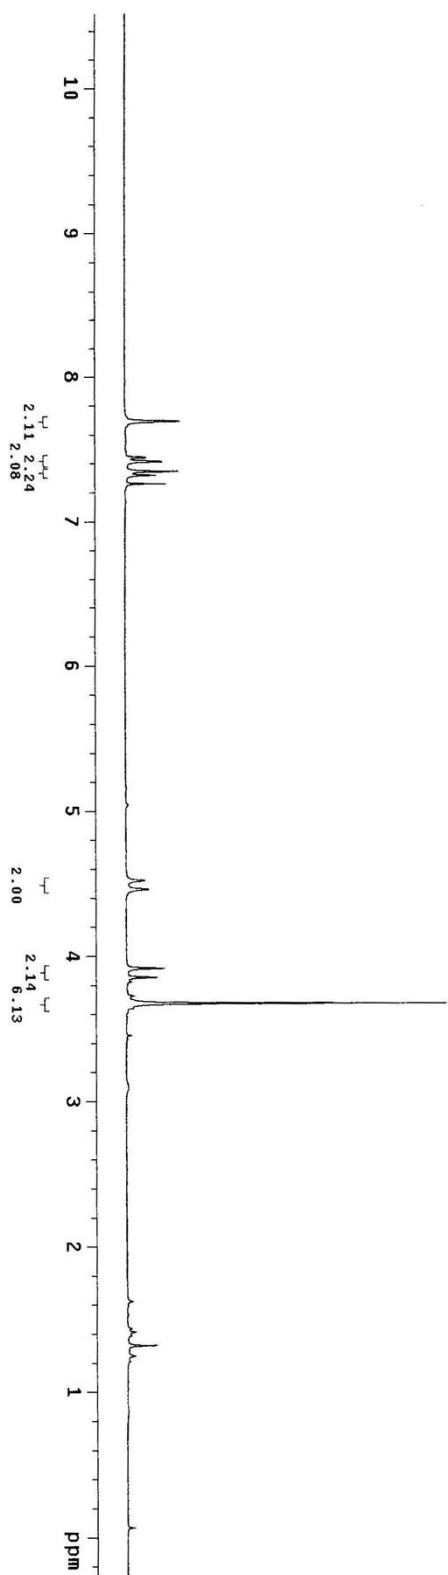

Table 2, entry 7

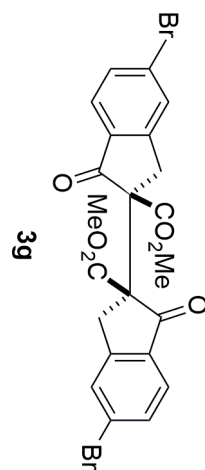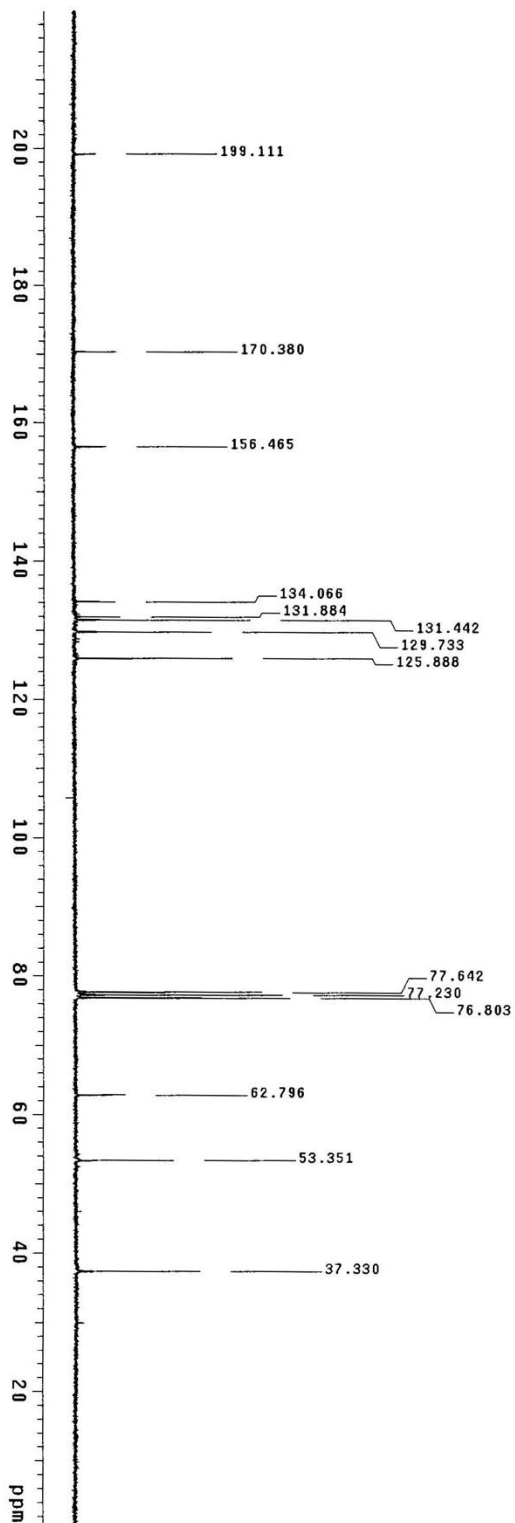

Table 2, entry 8

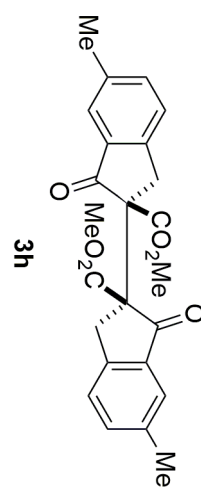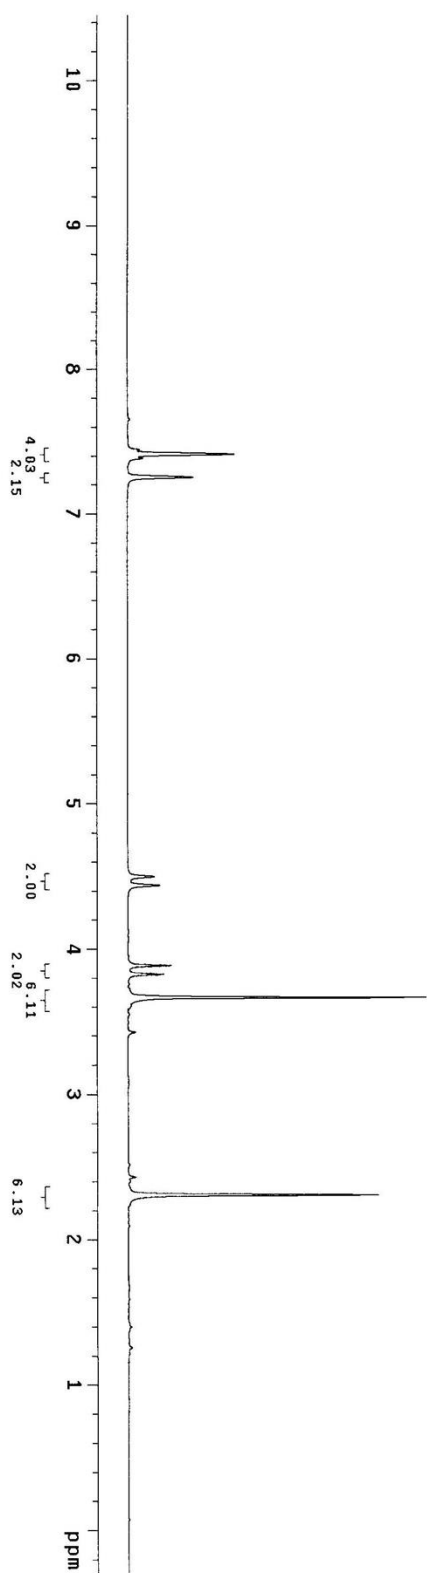

Table 2, entry 8

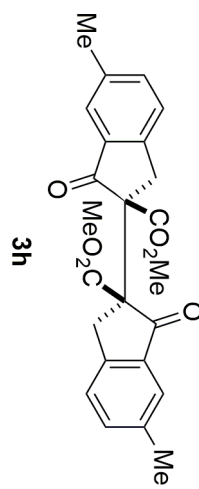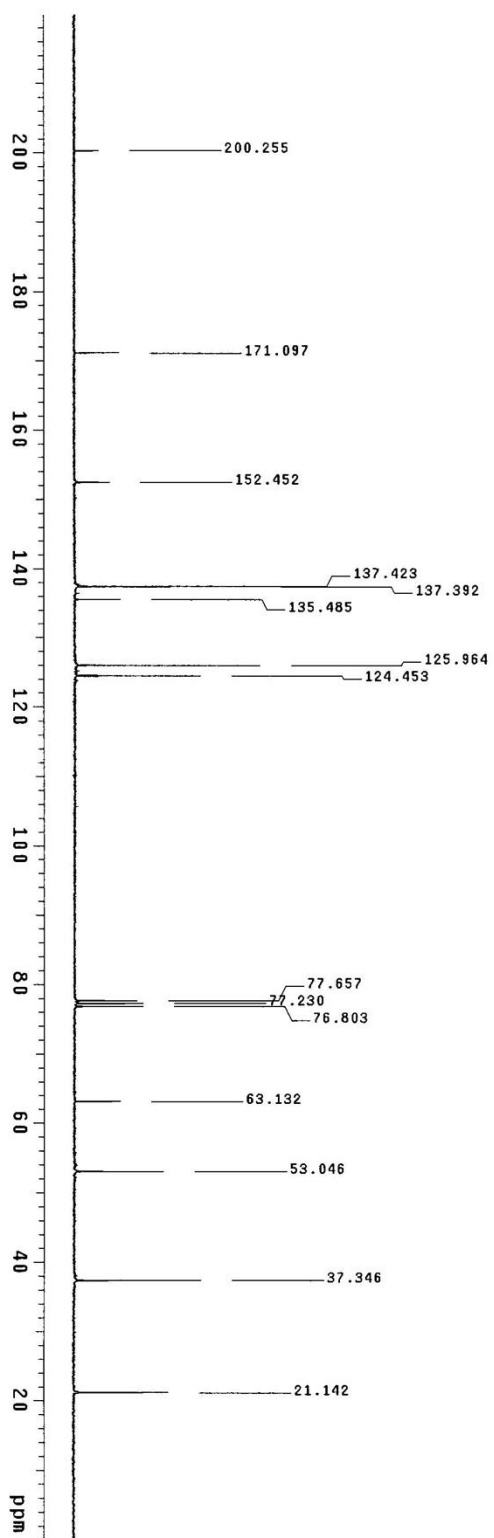



Table 2, entry 9

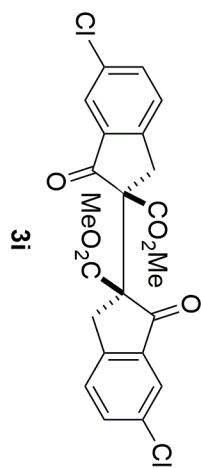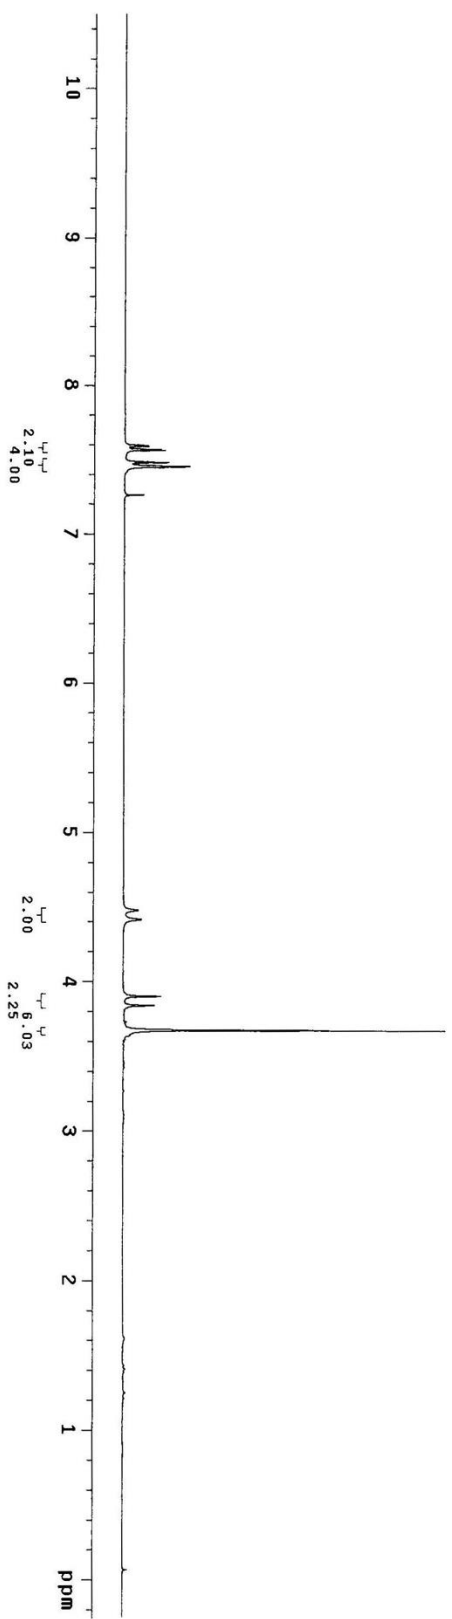

Table 2, entry 9

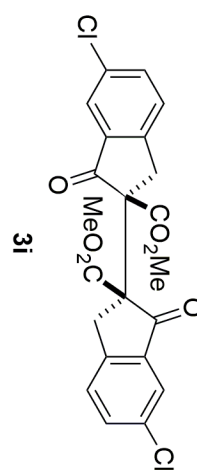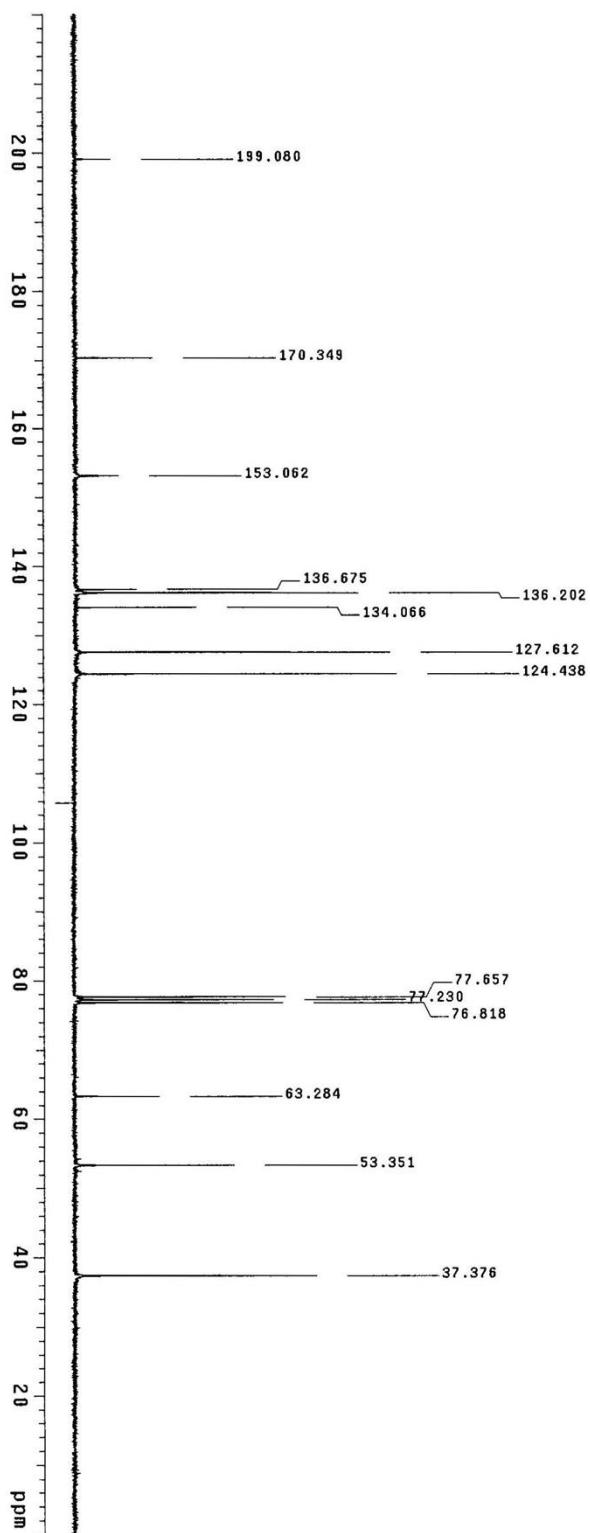

Table 2, entry 10

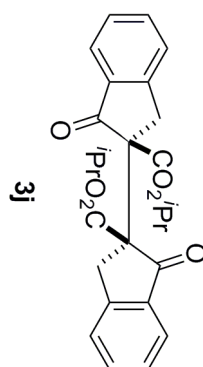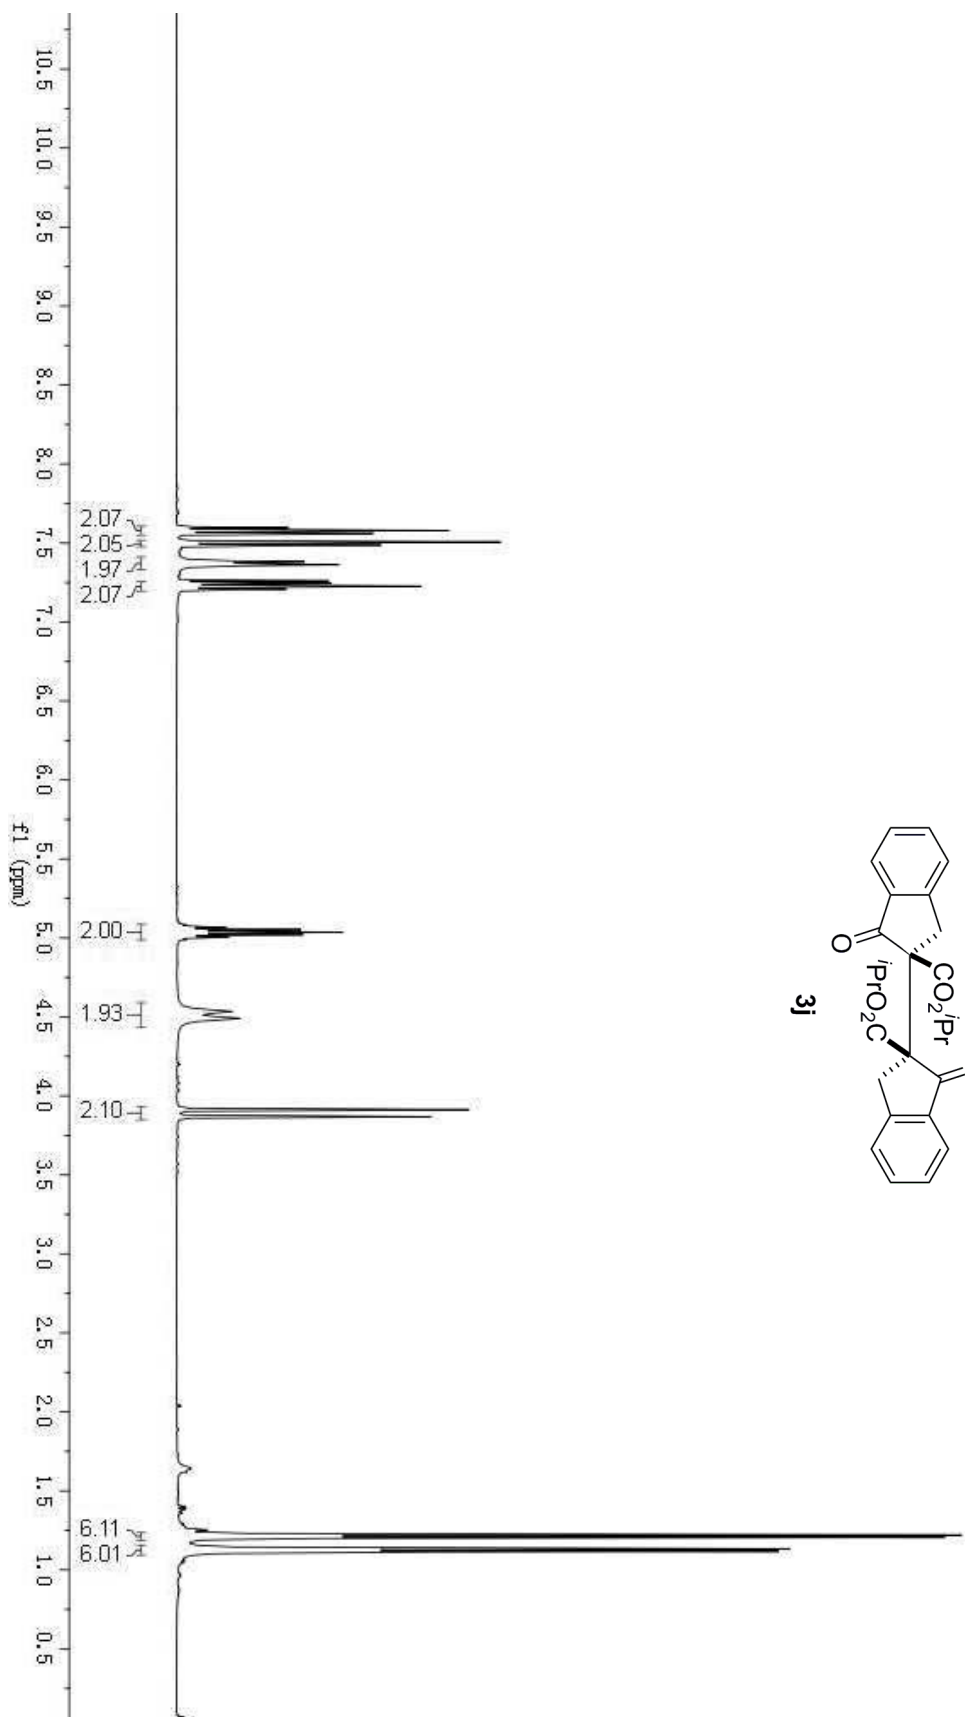

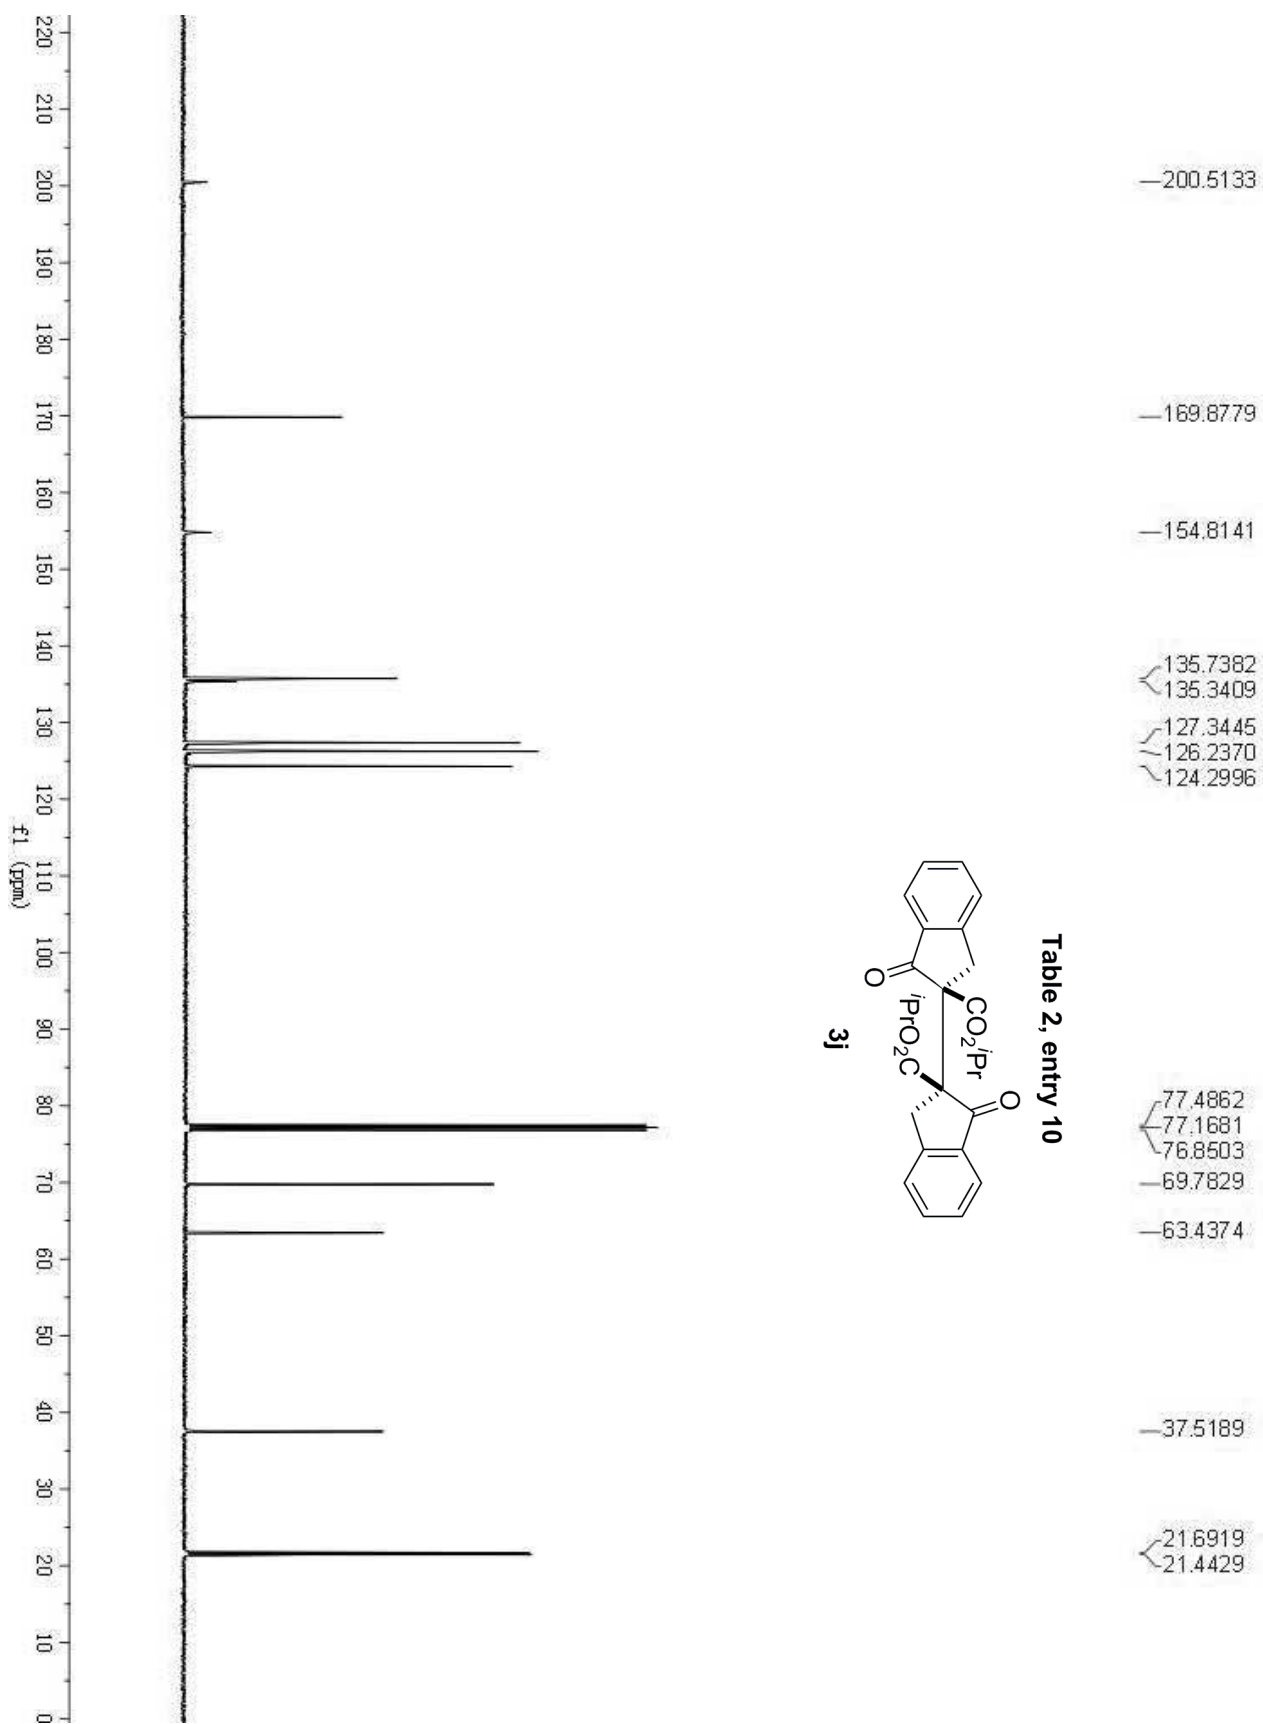

Table 2, entry 11

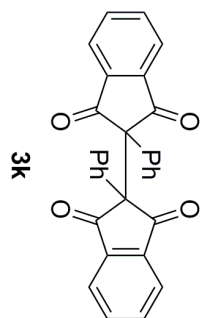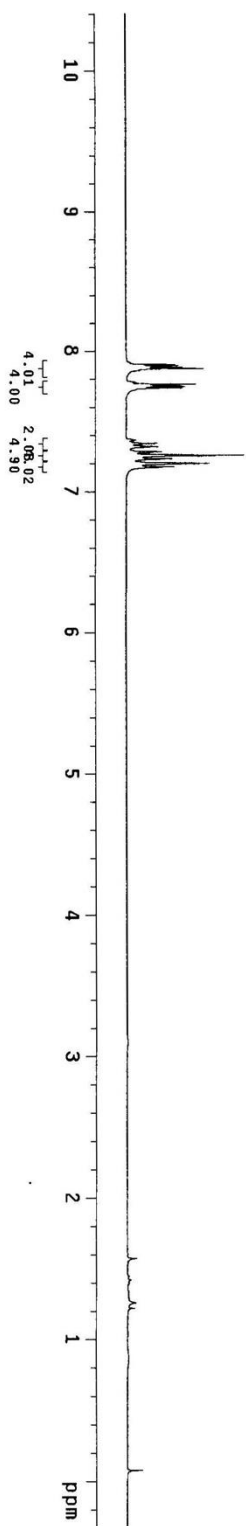

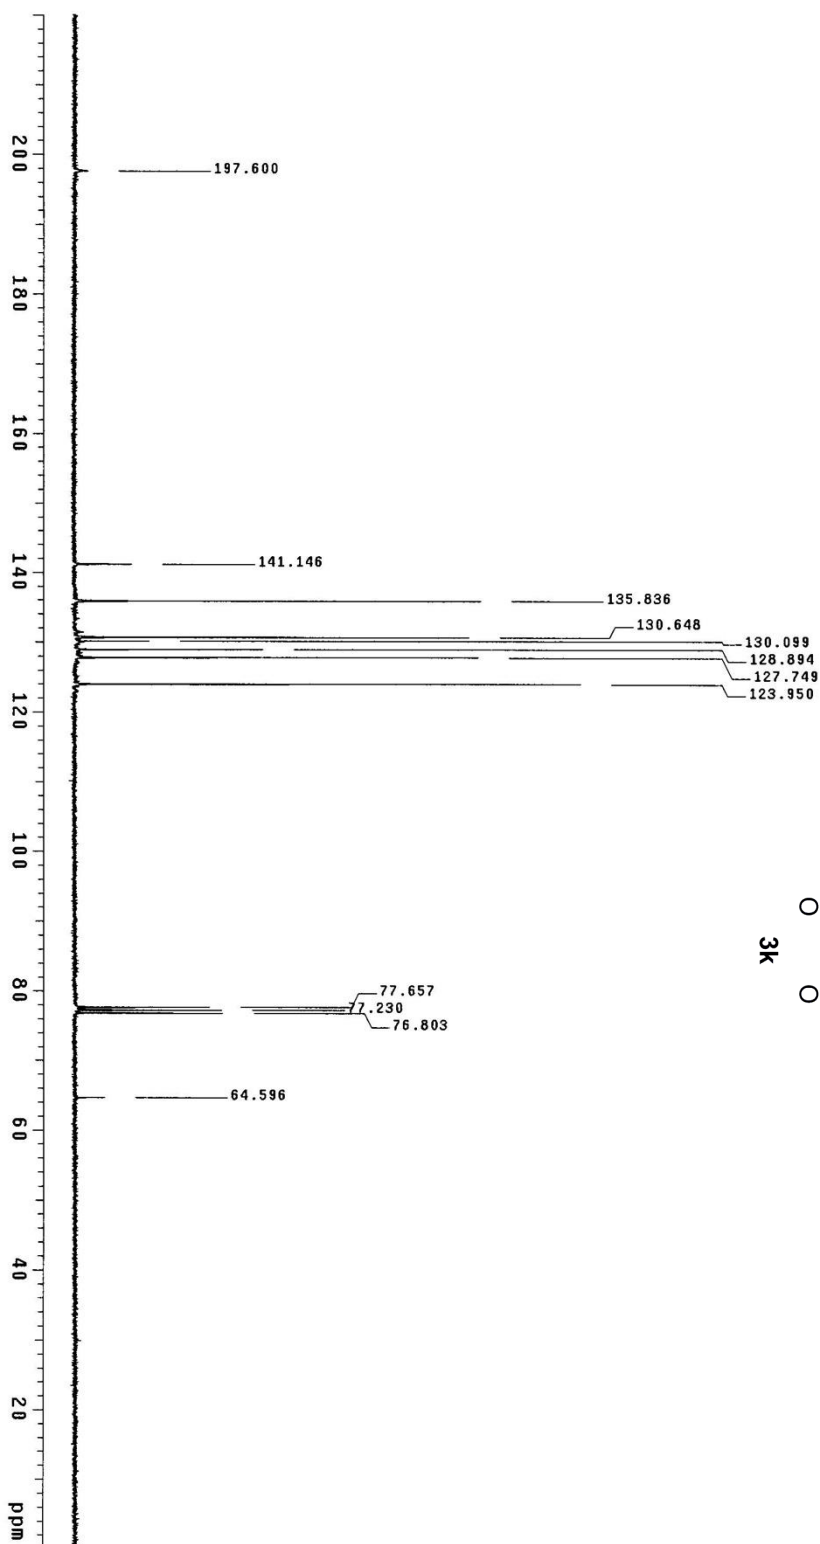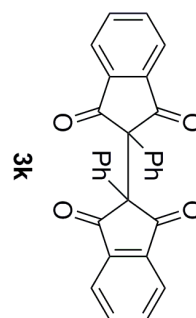

Table 2, entry 11

Scheme 3

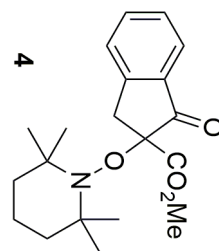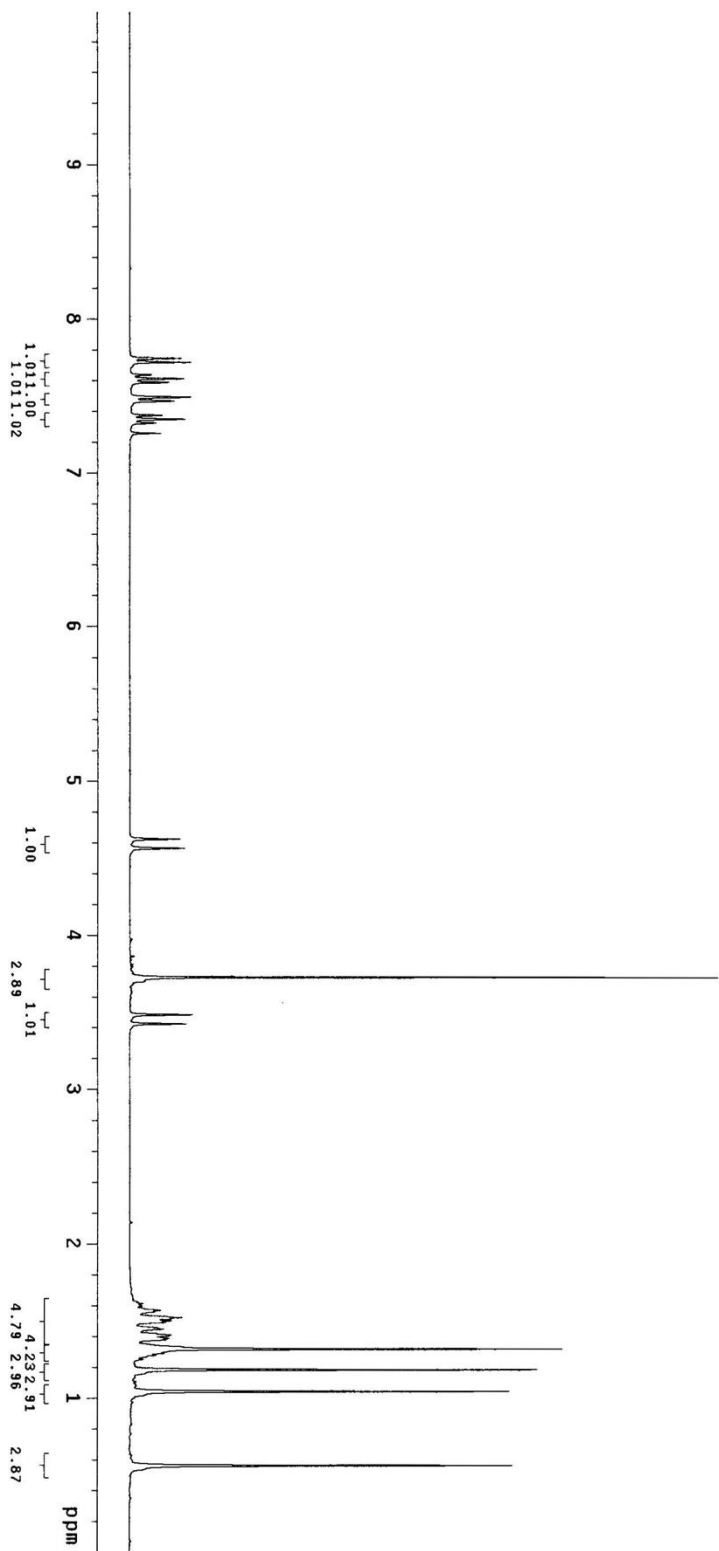

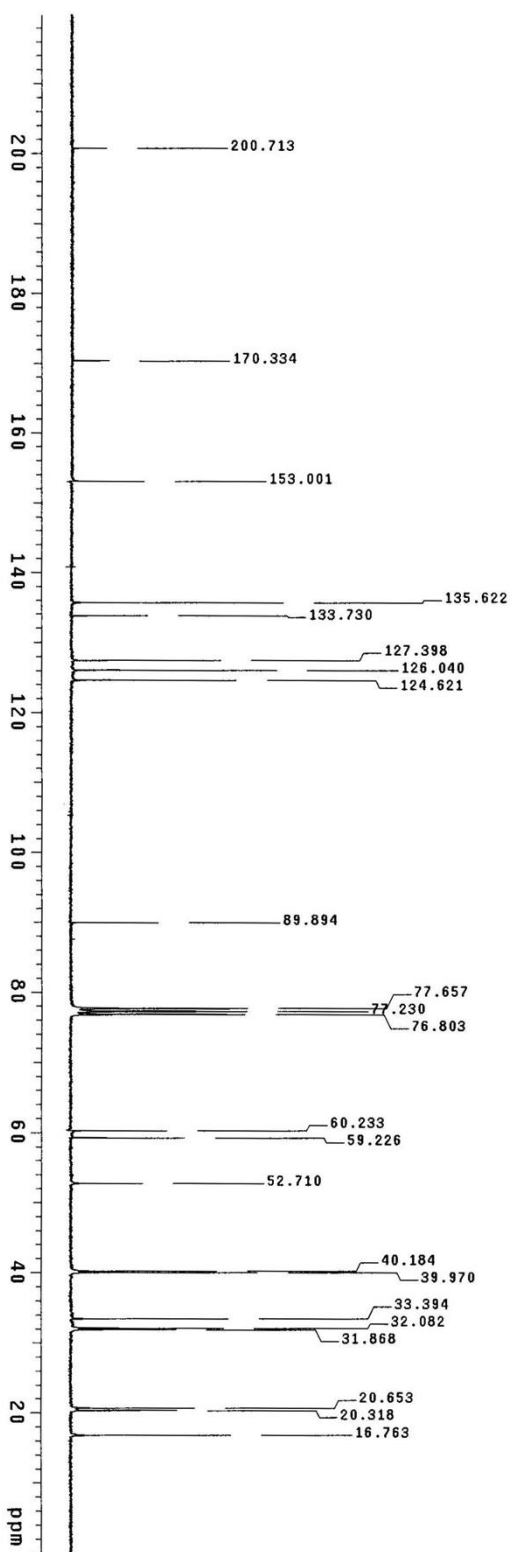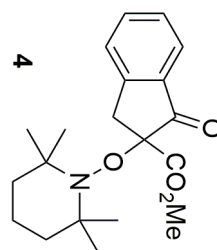

Scheme 3



Scheme 4

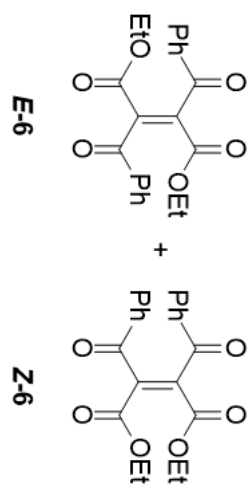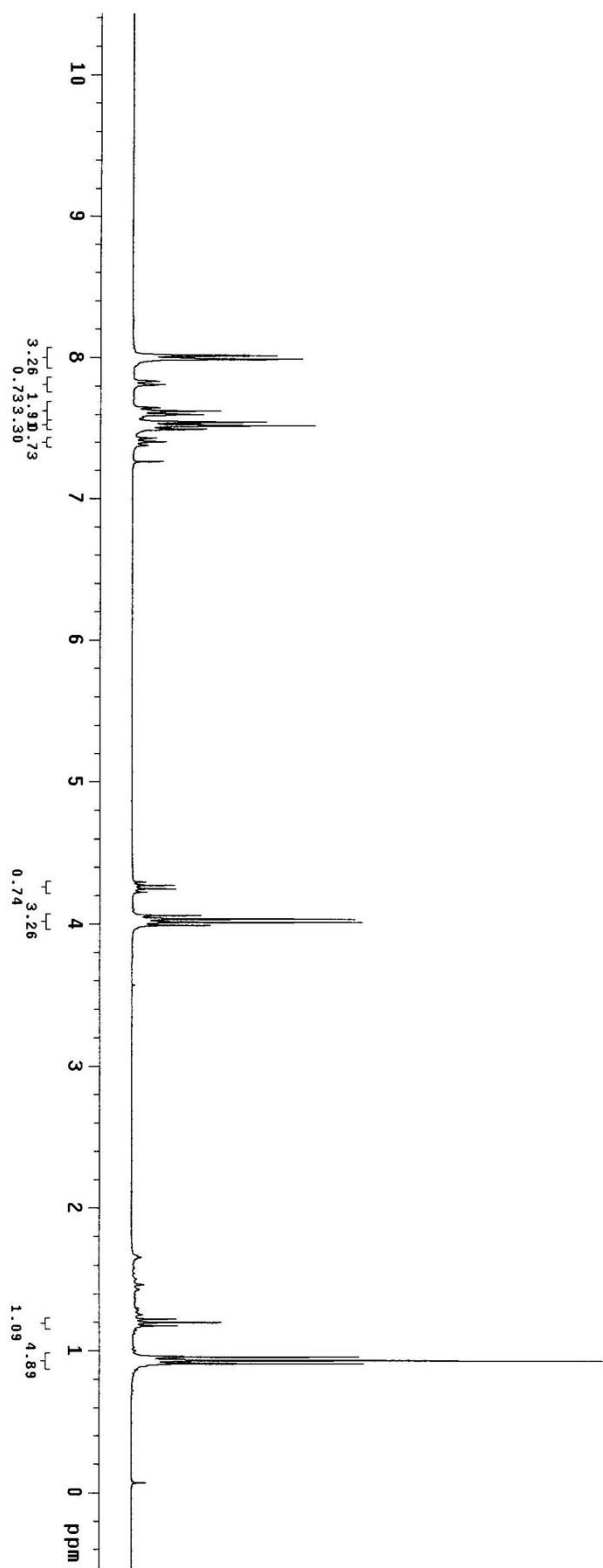

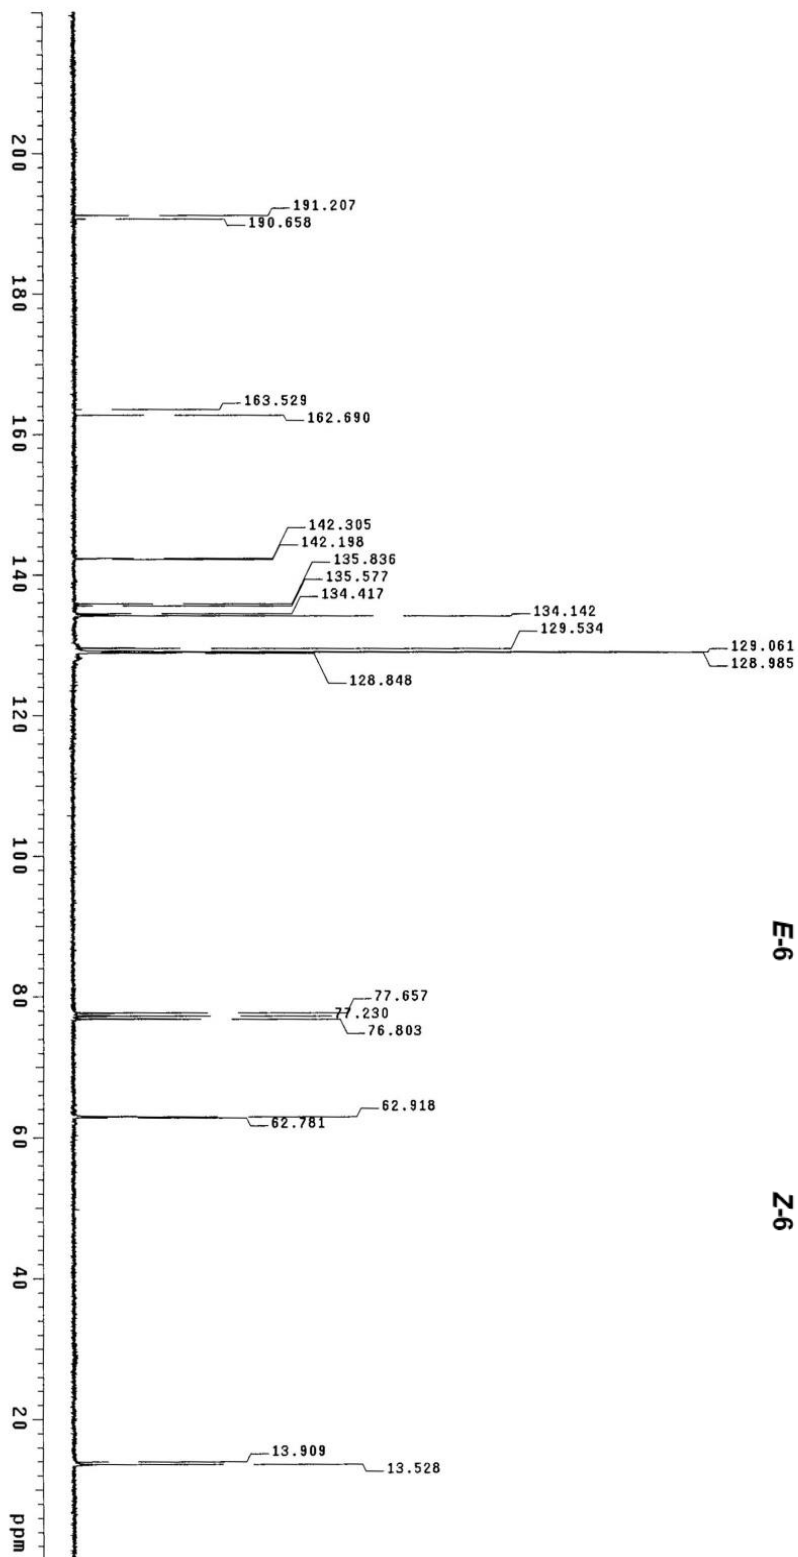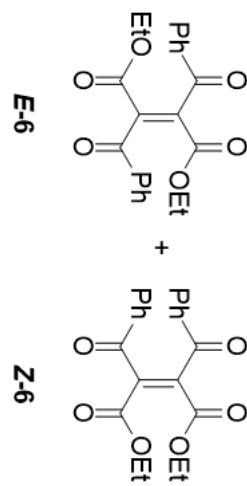

Scheme 4
